# Supplementary material for: Maftools: efficient and comprehensive analysis of somatic variants in cancer
Source: HighWire-hosted journal article supplement (doi:10.1101/gr.239244.118), 2018-10-19
Supplement: Supplemental_Table_S2.xlsx [file Supplemental_Table_S2.xlsx]

## Sheet: Supplemental Table S2
Supplemental Table S2: Mutation category and APOBEC enrichment scores for 96 ESCC samples.
Tumor_Sample_Barcode	A>G	T>C	C>T	G>A	A>T	T>A	A>C	T>G	C>A	G>T	C>G	G>C	n_A	n_T	n_G	n_C	n_mutations	n_C>G_and_C>T	tCw_to_A	tCw_to_T	tCw_to_G	tCw	wGa_to_C	wGa_to_T	wGa_to_A	wGa	tCw_to_G+tCw_to_T	n_bg_A	n_bg_T	n_bg_G	n_bg_C	n_bg_tcw	n_bg_wga	n_bg_bases	APOBEC_Enrichment_Score	non_APOBEC_mutations	fraction_APOBEC_mutations	P-value	OR (Odds-Ratio)	OR-High	OR-Low	APOBEC_Enriched	fdr
TCGA-IG-A5B8	9	10	83	65	4	5	2	3	18	26	45	58	15	18	149	146	328	251	4	46	35	85	49	9	37	95	167	3248	3256	3470	3474	614	575	13448	3.76447	161	0.509	0.00836803	1.39083	1.10406	Inf	yes	0.803331
TCGA-LN-A49M	12	6	72	63	3	3	2	0	10	24	33	31	17	9	118	115	259	199	6	41	26	73	21	7	33	61	121	2676	2566	2684	2693	432	445	10619	3.7904	138	0.467	0.23998	1.12232	0.871914	Inf	yes	1
TCGA-IG-A3Y9	4	6	52	60	1	3	2	0	11	19	56	51	7	9	130	119	265	219	7	31	38	76	36	4	29	69	134	2563	2748	2756	2798	490	424	10865	3.49391	131	0.506	0.259532	1.10661	0.869654	Inf	yes	1
TCGA-IG-A4P3	8	9	42	44	5	5	8	4	18	219	49	32	21	18	295	109	443	167	4	21	37	62	19	32	20	71	97	4529	4580	4555	4499	729	760	18163	3.58462	346	0.219	0.535008	0.999262	0.761691	Inf	yes	1
TCGA-LN-A4A9	17	14	33	36	8	4	7	7	22	24	25	30	32	25	90	80	227	124	8	22	14	44	21	4	15	40	72	2306	2334	2301	2366	400	398	9307	3.43452	155	0.317	0.572853	0.984147	0.715851	Inf	yes	1
TCGA-Z6-AAPN	8	8	69	66	3	5	8	4	23	35	99	90	19	17	191	191	418	324	11	26	66	103	63	9	28	100	183	4367	4195	4350	4226	692	737	17138	3.44929	235	0.438	0.748472	0.932639	0.768306	Inf	yes	1
TCGA-LN-A4A8	8	5	28	27	5	4	0	0	15	24	22	16	13	9	67	65	154	93	0	12	15	27	11	4	8	23	46	1616	1531	1559	1608	240	253	6314	3.31398	108	0.299	0.949282	0.724591	0.501262	Inf	yes	1
TCGA-LN-A4MR	7	12	41	38	2	4	3	2	13	27	12	23	12	18	88	66	184	114	2	16	7	25	15	5	16	36	54	1810	1847	1918	1969	355	271	7544	2.62728	130	0.293	0.994866	0.625133	0.448581	Inf	yes	1
TCGA-VR-AA7B	9	4	60	42	2	0	2	0	11	31	26	21	13	4	94	97	208	149	2	20	18	40	20	8	13	41	71	2153	2081	2152	2142	350	371	8528	2.91624	137	0.341	0.995659	0.654644	0.490363	Inf	yes	1
TCGA-S8-A6BW	4	4	44	41	3	3	1	3	23	37	11	7	8	10	85	78	181	103	6	15	8	29	5	9	19	33	47	1831	1847	1777	1966	323	283	7421	2.77742	134	0.26	0.995813	0.602515	0.424158	Inf	yes	1
TCGA-Q9-A6FU	7	8	37	46	4	1	1	5	11	23	36	38	12	14	107	84	217	157	3	10	23	36	24	6	17	47	74	2226	2269	2182	2220	393	365	8897	2.66252	143	0.341	0.998596	0.623461	0.470528	Inf	yes	1
TCGA-L5-A8NQ	9	7	75	71	6	4	3	3	21	78	47	27	18	14	176	143	351	220	7	33	29	69	16	18	28	62	106	3517	3496	3712	3666	604	583	14391	2.92441	245	0.302	0.998766	0.666824	0.527216	Inf	yes	1
TCGA-Z6-A8JD	5	10	50	48	4	3	2	5	16	35	42	34	11	18	117	108	254	174	7	11	34	52	22	8	11	41	78	2441	2514	2668	2791	414	402	10414	3.02207	176	0.307	0.999613	0.60266	0.461209	Inf	yes	1
TCGA-LN-A9FO	15	9	37	27	2	2	2	0	11	42	13	13	19	11	82	61	173	90	1	12	9	22	10	5	5	20	36	1607	1763	1861	1862	300	249	7093	2.48267	137	0.208	0.999775	0.48174	0.327746	Inf	yes	1
TCGA-LN-A49S	12	15	48	30	7	2	1	1	6	38	14	16	20	18	84	68	190	108	1	13	8	22	13	5	10	28	44	1919	1897	2034	1940	295	330	7790	2.67922	146	0.232	0.999822	0.506092	0.357086	Inf	yes	1
TCGA-VR-A8EP	4	11	22	18	5	5	2	4	9	18	10	12	11	20	48	41	120	62	1	4	5	10	9	0	3	12	21	1199	1176	1281	1264	168	193	4920	2.54839	99	0.175	0.999891	0.392154	0.239714	Inf	yes	1
TCGA-LN-A49U	7	8	41	39	5	6	2	2	9	20	14	21	14	16	80	64	174	115	2	10	7	19	12	2	17	31	46	1708	1677	1882	1867	262	272	7134	2.85038	128	0.264	0.999894	0.502667	0.358174	Inf	yes	1
TCGA-LN-A7HW	8	3	26	32	4	4	0	1	8	22	8	13	12	8	67	42	129	79	0	6	5	11	11	4	7	22	29	1195	1291	1465	1338	193	204	5289	2.54489	100	0.225	0.999903	0.433898	0.284345	Inf	yes	1
TCGA-IG-A4QT	0	0	9	4	0	0	0	0	1	12	0	0	0	0	16	10	26	13	0	0	0	0	0	2	1	3	1	271	235	279	281	46	45	1066	0.4699	25	0.038	0.999986	0.0601073	0.00281215	Inf	no	1
TCGA-LN-A49O	10	12	17	13	5	3	1	1	7	21	4	0	16	16	34	28	94	34	2	3	4	9	0	3	1	4	8	950	945	977	982	152	137	3854	1.52012	86	0.085	0.999987	0.225366	0.102098	Inf	no	1
TCGA-LN-A49N	8	4	15	10	3	2	0	1	7	21	3	4	11	7	35	25	78	32	1	3	2	6	1	3	1	5	7	717	832	838	811	117	102	3198	1.51629	71	0.09	0.999988	0.209581	0.0896329	Inf	no	1
TCGA-JY-A6FD	9	6	50	35	4	7	3	1	20	98	14	16	16	14	149	84	263	115	6	15	8	29	8	20	12	40	43	2545	2701	2916	2621	396	443	10783	2.47481	220	0.163	0.999994	0.440508	0.312732	Inf	yes	1
TCGA-IG-A3YB	3	6	24	12	2	2	1	2	6	24	9	4	6	10	40	39	95	49	1	3	6	10	2	3	2	7	13	923	902	1053	1017	142	129	3895	1.90011	82	0.137	0.999995	0.272789	0.148057	Inf	no	1
TCGA-LN-A49L	7	11	27	24	4	4	3	5	22	39	11	19	14	20	82	60	176	81	10	8	4	22	9	7	6	22	27	1683	1829	1887	1817	286	300	7216	2.11772	149	0.153	0.999997	0.364102	0.237591	Inf	yes	1
TCGA-L5-A43H	10	11	28	22	5	2	1	0	12	25	7	4	16	13	51	47	127	61	3	4	5	12	3	4	5	12	17	1266	1260	1394	1287	200	206	5207	1.79336	110	0.134	0.999999	0.282565	0.166304	Inf	no	1
TCGA-JY-A6FA	11	8	32	28	1	4	4	1	23	66	12	11	16	13	105	67	201	83	7	4	7	18	7	9	8	24	26	2029	2047	2093	2072	320	333	8241	2.02831	175	0.129	1	0.334181	0.217615	Inf	yes	1
TCGA-VR-AA7I	6	7	19	22	4	2	5	4	5	15	3	4	15	13	41	27	96	48	2	3	3	8	2	0	3	5	11	980	965	986	1005	147	150	3936	1.56675	85	0.115	1	0.221577	0.114904	Inf	no	1
TCGA-VR-A8ET	1	1	15	11	1	1	1	1	5	14	1	0	3	3	25	21	52	27	2	1	1	4	0	2	1	3	3	501	504	561	566	80	98	2132	0.786111	49	0.058	1	0.0941974	0.0239681	Inf	no	1
TCGA-VR-AA7D	4	3	34	32	4	6	1	1	14	24	6	8	9	10	64	54	137	80	2	8	4	14	5	5	6	16	23	1312	1274	1540	1491	215	215	5617	1.99378	114	0.168	1	0.301919	0.192156	Inf	no	1
TCGA-VR-A8EW	13	11	32	38	4	6	2	3	9	32	9	9	19	20	79	50	168	88	1	6	3	10	6	6	12	24	27	1669	1675	1825	1719	279	274	6888	1.8904	141	0.161	1	0.31911	0.209809	Inf	no	1
TCGA-IG-A3YC	3	4	19	16	5	3	0	2	5	26	7	7	8	9	49	31	97	49	1	3	3	7	2	3	2	7	10	911	995	980	1091	149	131	3977	1.49432	87	0.103	1	0.194912	0.098458	Inf	no	1
TCGA-Z6-A8JE	5	15	41	49	2	6	4	1	19	71	29	26	11	22	146	89	268	145	5	7	18	30	14	10	13	37	52	2636	2631	2931	2790	449	392	10988	2.2284	216	0.194	1	0.404183	0.297442	Inf	yes	1
TCGA-L5-A8NK	9	8	71	69	2	8	3	0	18	58	23	38	14	16	165	112	307	201	5	15	16	36	28	13	18	59	77	3002	3008	3339	3238	477	500	12587	2.60048	230	0.251	1	0.461555	0.357809	Inf	yes	1
TCGA-LN-A49P	4	5	17	23	4	2	0	2	1	18	2	5	8	9	46	20	83	47	0	3	1	4	2	3	3	8	9	864	858	841	840	123	125	3403	1.30773	74	0.108	1	0.176485	0.0857245	Inf	no	1
TCGA-IG-A6QS	5	9	21	20	1	2	1	1	15	73	2	6	7	12	99	38	156	49	0	2	2	4	4	9	2	15	10	1574	1535	1656	1631	259	229	6396	1.28516	146	0.064	1	0.186216	0.0942048	Inf	no	1
TCGA-LN-A7HX	14	6	33	34	2	4	2	2	43	127	16	9	18	12	170	92	292	92	14	6	8	28	5	32	9	46	28	2968	3088	3045	2871	488	495	11972	1.79054	264	0.096	1	0.31044	0.206275	Inf	no	1
TCGA-LN-A49R	15	16	14	18	7	7	2	3	11	35	9	5	24	26	58	34	142	46	2	2	5	9	1	5	1	7	9	1521	1491	1447	1363	230	254	5822	1.15945	133	0.063	1	0.173092	0.0841198	Inf	no	1
TCGA-LN-A5U6	4	3	18	20	5	3	4	1	9	20	7	6	13	7	46	34	100	51	0	2	1	3	2	2	5	9	10	1042	978	1078	1002	148	165	4100	1.3275	90	0.1	1	0.181249	0.0917923	Inf	no	1
TCGA-L5-A4OM	4	10	20	19	2	3	1	2	6	6	2	2	7	15	27	28	77	43	1	4	1	6	1	0	1	2	7	734	797	810	816	116	120	3157	1.14515	70	0.091	1	0.146209	0.0641013	Inf	no	1
TCGA-IG-A51D	7	7	54	44	3	1	3	1	14	39	17	13	13	9	96	85	203	128	1	15	10	26	6	8	10	24	41	1922	2072	2137	2192	297	284	8323	2.36406	162	0.202	1	0.358877	0.255846	Inf	yes	1
TCGA-LN-A4A6	14	11	31	20	9	6	1	5	5	31	3	5	24	22	56	39	141	59	1	8	2	11	1	6	2	9	13	1445	1492	1454	1390	218	221	5781	1.40491	128	0.092	1	0.206088	0.113856	Inf	no	1
TCGA-IG-A97I	4	5	41	36	5	8	4	2	5	23	17	11	13	15	70	63	161	105	2	8	10	20	6	4	8	18	32	1579	1683	1695	1644	284	266	6601	1.76419	129	0.199	1	0.30932	0.210879	Inf	no	1
TCGA-IG-A3YA	2	7	16	17	5	2	2	2	7	35	5	3	9	11	55	28	103	41	1	1	3	5	1	5	1	7	6	1003	995	1103	1122	171	136	4223	0.960205	97	0.058	1	0.126195	0.0515733	Inf	no	1
TCGA-L7-A56G	8	6	29	18	7	3	1	2	3	14	2	6	16	11	38	34	99	55	0	4	1	5	1	3	4	8	10	915	946	1098	1100	164	140	4059	1.21951	89	0.101	1	0.164649	0.0838627	Inf	no	1
TCGA-LN-A4A3	12	4	18	22	2	6	3	2	7	29	4	3	17	12	54	29	112	47	1	3	1	5	1	5	2	8	7	1156	1141	1154	1141	156	167	4592	1.08933	105	0.062	1	0.133013	0.0587884	Inf	no	1
TCGA-IG-A5S3	4	3	9	27	1	2	2	0	7	17	7	2	7	5	46	23	81	45	3	0	5	8	0	4	1	5	6	787	819	903	812	107	119	3321	1.01184	75	0.074	1	0.118155	0.0484995	Inf	no	1
TCGA-VR-A8EX	11	13	65	47	5	12	3	0	29	56	20	19	19	25	122	114	280	151	12	15	10	37	15	12	9	36	49	2821	2801	2890	2968	439	446	11480	2.19391	231	0.175	1	0.356652	0.262039	Inf	yes	1
TCGA-VR-A8ER	10	4	24	18	4	3	2	1	17	62	5	3	16	8	83	46	153	50	5	3	3	11	1	12	1	14	8	1469	1573	1690	1541	236	244	6273	1.04475	145	0.052	1	0.139977	0.0656178	Inf	no	1
TCGA-LN-A4A4	13	12	32	25	5	0	1	3	3	28	5	8	19	15	61	40	135	70	0	5	3	8	5	3	2	10	15	1329	1376	1451	1379	208	216	5535	1.42067	120	0.111	1	0.201343	0.116645	Inf	no	1
TCGA-LN-A49K	4	7	18	25	3	6	1	0	9	25	1	3	8	13	53	28	102	47	1	1	0	2	1	4	5	10	7	1043	1053	1073	1013	165	153	4182	0.914378	95	0.069	1	0.126099	0.0557215	Inf	no	1
TCGA-LN-A5U5	2	3	14	14	0	1	3	1	11	15	4	3	5	5	32	29	71	35	0	2	0	2	0	2	1	3	3	640	720	794	757	109	83	2911	0.595282	68	0.042	1	0.0702422	0.0181819	Inf	no	1
TCGA-LN-A7HV	23	15	23	22	4	8	1	4	15	16	8	4	28	27	42	46	143	57	2	3	3	8	0	5	4	9	10	1503	1461	1431	1468	224	245	5863	1.14975	133	0.07	1	0.156545	0.0799972	Inf	no	1
TCGA-LN-A4MQ	3	6	17	26	5	3	2	1	4	8	5	4	10	10	38	26	84	52	0	2	2	4	2	1	2	5	8	844	792	941	867	130	121	3444	1.02604	76	0.095	1	0.134551	0.0630552	Inf	no	1
TCGA-KH-A6WC	2	6	13	11	0	0	0	1	49	124	3	0	2	7	135	65	209	27	18	0	1	19	0	26	0	26	1	2112	2102	2230	2125	325	342	8569	0.242165	208	0.005	1	0.0282633	0.00137841	Inf	no	1
TCGA-VR-A8EO	5	2	34	16	4	1	0	1	11	62	2	4	9	4	82	47	142	56	3	4	1	8	1	13	3	17	9	1422	1430	1517	1453	203	217	5822	1.15033	133	0.063	1	0.144641	0.0712456	Inf	no	1
TCGA-IG-A3QL	5	6	24	31	7	5	2	0	9	23	5	5	14	11	59	38	122	65	2	4	1	7	1	1	6	8	12	1184	1253	1323	1242	185	173	5002	1.23942	110	0.098	1	0.167792	0.091333	Inf	no	1
TCGA-LN-A49W	12	15	20	22	3	4	1	2	11	19	2	10	16	21	51	33	121	54	2	3	0	5	4	1	1	6	8	1195	1267	1295	1204	184	184	4961	0.969404	113	0.066	1	0.127908	0.0601707	Inf	no	1
TCGA-LN-A49Y	7	2	27	38	2	9	0	3	64	74	24	26	9	14	138	115	276	115	5	8	6	19	7	8	10	25	31	2599	2634	3073	3010	435	447	11316	1.86527	245	0.112	1	0.275905	0.189032	Inf	no	1
TCGA-L5-A88W	9	5	42	42	4	2	2	5	14	36	15	10	15	12	88	71	186	109	2	7	7	16	5	7	9	21	28	1867	1817	1921	2021	305	277	7626	1.70215	158	0.151	1	0.255105	0.171438	Inf	no	1
TCGA-IG-A3I8	7	6	38	34	2	2	0	3	7	31	7	4	9	11	69	52	141	83	1	9	5	15	0	8	2	10	16	1379	1410	1490	1502	228	208	5781	1.26992	125	0.113	1	0.175937	0.10462	Inf	no	1
TCGA-LN-A4A5	8	10	21	14	6	3	2	1	7	27	2	3	16	14	44	30	104	40	1	0	1	2	0	6	1	7	2	1066	1057	1076	1065	166	181	4264	0.320783	102	0.019	1	0.0384758	0.00660213	Inf	no	1
TCGA-IG-A50L	14	18	21	27	4	7	1	2	11	35	11	5	19	27	67	43	156	64	1	2	5	8	0	13	2	15	9	1547	1658	1614	1577	255	233	6396	0.869669	147	0.058	1	0.11816	0.0586653	Inf	no	1
TCGA-IG-A8O2	8	17	49	47	6	6	4	5	15	35	12	9	18	28	91	76	213	117	4	13	4	21	4	8	7	19	28	2017	2159	2323	2234	355	312	8733	1.50601	185	0.131	1	0.2284	0.154224	Inf	no	1
TCGA-XP-A8T7	9	4	37	38	4	4	0	1	23	67	9	5	13	9	110	69	201	89	4	6	3	13	2	8	5	15	16	2021	1973	2125	2122	301	333	8241	1.26739	185	0.08	1	0.164814	0.0984891	Inf	no	1
TCGA-VR-A8EY	6	8	36	24	5	1	4	1	12	57	9	8	15	10	89	57	171	77	3	3	3	9	3	8	3	14	12	1657	1663	1905	1786	263	263	7011	1.05832	159	0.07	1	0.137303	0.0755198	Inf	no	1
TCGA-LN-A49X	8	12	31	22	4	1	0	0	8	23	6	5	12	13	50	45	120	64	0	4	1	5	1	6	1	8	7	1180	1211	1285	1244	178	193	4920	0.764396	113	0.058	1	0.0921339	0.0413741	Inf	no	1
TCGA-LN-A9FR	3	13	27	27	3	5	1	0	14	38	3	3	7	18	68	44	137	60	3	1	1	5	2	4	2	8	6	1359	1396	1418	1444	221	221	5617	0.653394	131	0.044	1	0.0816713	0.0340951	Inf	no	1
TCGA-IG-A625	6	6	22	26	2	4	2	1	10	17	1	1	10	11	44	33	98	50	4	1	0	5	0	5	2	7	3	959	1038	1021	1000	146	143	4018	0.410959	95	0.031	1	0.0476155	0.0125112	Inf	no	1
TCGA-LN-A4A2	14	10	46	34	3	4	3	2	19	29	10	12	20	16	75	75	186	102	3	6	4	13	6	5	3	14	19	1895	1876	1962	1893	261	282	7626	1.35103	167	0.102	1	0.173487	0.10841	Inf	no	1
TCGA-LN-A9FQ	9	5	43	36	4	5	2	0	12	36	14	9	15	10	81	69	175	102	3	8	6	17	3	9	2	14	19	1697	1690	1906	1882	264	264	7175	1.32791	156	0.109	1	0.172641	0.107878	Inf	no	1
TCGA-VR-AA4G	14	10	34	30	6	6	2	3	9	52	5	6	22	19	88	48	177	75	1	2	2	5	3	8	2	13	9	1765	1826	1852	1814	257	261	7257	0.847004	168	0.051	1	0.102575	0.0513328	Inf	no	1
TCGA-IC-A6RF	7	7	34	41	5	1	3	2	33	100	7	4	15	10	145	74	244	86	9	3	0	12	0	18	2	20	5	2294	2367	2696	2647	357	358	10004	0.431079	239	0.02	1	0.0470749	0.0180547	Inf	no	1
TCGA-IG-A97H	11	9	35	29	5	4	1	2	13	75	7	2	17	15	106	55	193	73	3	1	2	6	0	15	3	18	6	1884	1950	2052	2027	309	275	7913	0.539167	187	0.031	1	0.0658963	0.0277319	Inf	no	1
TCGA-JY-A6FE	10	3	21	17	2	1	4	3	13	80	5	3	16	7	100	39	162	46	4	1	0	5	0	19	0	19	1	1731	1599	1712	1600	228	277	6642	0.152555	161	0.006	1	0.016702	0.000823521	Inf	no	1
TCGA-JY-A6FG	12	8	73	68	4	4	2	7	42	77	6	9	18	19	154	121	312	156	7	10	3	20	2	11	9	22	24	3170	3024	3376	3222	444	475	12792	1.11642	288	0.077	1	0.137827	0.0919381	Inf	no	1
TCGA-JY-A93F	3	10	52	41	7	6	0	2	6	49	3	5	10	18	95	61	184	101	1	6	1	8	0	5	2	7	9	1779	1746	2038	1981	263	254	7544	0.671197	175	0.049	1	0.0749326	0.0379102	Inf	no	1
TCGA-L5-A43J	64	57	215	195	8	13	8	8	43	53	12	12	80	78	260	270	688	434	5	6	2	13	5	9	4	18	17	6302	6272	7733	7901	904	964	28208	0.342352	671	0.025	1	0.0324006	0.0204533	Inf	no	1
TCGA-L5-A88S	16	16	39	34	4	8	2	1	9	31	3	7	22	25	72	51	170	83	2	3	2	7	3	3	2	8	10	1715	1731	1775	1749	255	245	6970	0.826364	160	0.059	1	0.102182	0.0532693	Inf	no	1
TCGA-L5-A88Z	10	11	35	46	7	6	1	0	14	53	7	7	18	17	106	56	197	95	3	0	2	5	2	13	5	20	9	1964	1949	2062	2102	286	306	8077	0.696283	188	0.046	1	0.0796213	0.0402336	Inf	no	1
TCGA-LN-A49V	5	4	34	32	2	1	0	4	4	17	6	3	7	9	52	44	112	75	0	2	0	2	0	2	2	4	4	1061	1013	1272	1246	150	176	4592	0.443022	108	0.036	1	0.0442673	0.0147066	Inf	no	1
TCGA-LN-A4A1	16	14	27	29	7	7	1	2	16	36	12	9	24	23	74	55	176	77	2	1	3	6	0	4	2	6	6	1707	1667	1904	1938	251	255	7216	0.601645	170	0.034	1	0.0651752	0.0274669	Inf	no	1
TCGA-LN-A5U7	13	10	29	46	3	2	3	1	20	37	15	11	19	13	94	64	190	101	6	2	3	11	1	10	9	20	15	1842	1869	2059	2020	293	276	7790	1.02389	175	0.079	1	0.130297	0.0771253	Inf	no	1
TCGA-LN-A7HY	14	20	45	38	7	6	5	0	16	31	17	16	26	26	85	78	215	116	3	6	6	15	7	4	3	14	22	2210	2088	2356	2161	291	355	8815	1.4084	193	0.102	1	0.178532	0.115647	Inf	no	1
TCGA-LN-A7HZ	9	9	22	26	1	0	2	4	6	14	7	3	12	13	43	35	103	58	2	0	4	6	0	4	0	4	4	930	1056	1151	1086	171	128	4223	0.437992	99	0.039	1	0.0539716	0.017795	Inf	no	1
TCGA-LN-A8HZ	14	18	46	35	6	9	2	2	13	46	6	7	22	29	88	65	204	94	4	3	3	10	2	8	5	15	13	1907	2075	2147	2235	336	312	8364	0.919928	191	0.064	1	0.1186	0.0673916	Inf	no	1
TCGA-LN-A8I0	12	9	48	40	10	9	1	1	18	50	2	6	23	19	96	68	206	96	4	2	0	6	3	9	5	17	10	2083	2111	2119	2133	334	345	8446	0.665232	196	0.049	1	0.0848341	0.0444843	Inf	no	1
TCGA-LN-A8I1	10	9	44	30	1	5	1	3	20	62	5	8	12	17	100	69	198	87	2	3	1	6	4	10	2	16	10	1918	1941	2132	2127	330	291	8118	0.740857	188	0.051	1	0.0950297	0.0496392	Inf	no	1
TCGA-LN-A9FP	6	10	66	48	16	12	1	1	123	135	36	52	23	23	235	225	506	202	16	19	8	43	10	19	15	44	52	4820	4785	5537	5604	741	737	20746	1.94685	454	0.103	1	0.265726	0.200032	Inf	no	1
TCGA-V5-A7RC	6	15	23	26	0	3	3	2	30	49	8	11	9	20	86	61	176	68	2	1	1	4	1	3	2	6	5	1613	1742	1885	1976	271	249	7216	0.536141	171	0.028	1	0.0602762	0.0229578	Inf	no	1
TCGA-V5-AASV	7	5	34	43	3	4	2	3	14	43	2	2	12	12	88	50	162	81	0	1	0	1	0	7	2	9	3	1550	1531	1775	1786	235	213	6642	0.281481	159	0.019	1	0.0295336	0.00788411	Inf	no	1
TCGA-VR-A8EU	13	12	50	44	9	9	6	1	18	40	3	7	28	22	91	71	212	104	4	4	1	9	4	5	2	11	11	2147	2119	2256	2170	313	317	8692	0.733288	201	0.052	1	0.0885002	0.0480305	Inf	no	1
TCGA-VR-A8EZ	14	14	48	38	8	9	3	3	25	85	24	16	25	26	139	97	287	126	8	9	7	24	5	15	4	24	25	2816	2996	2954	3001	470	430	11767	1.26689	262	0.087	1	0.180528	0.120251	Inf	no	1
TCGA-VR-A8Q7	13	12	39	32	4	4	2	2	12	17	6	9	19	18	58	57	152	86	1	5	1	7	1	1	3	5	10	1468	1575	1573	1616	236	226	6232	0.796216	142	0.066	1	0.0981046	0.0512014	Inf	no	1
TCGA-XP-A8T6	15	17	42	56	8	9	2	2	15	40	5	3	25	28	99	62	214	106	0	5	3	8	1	2	4	7	13	2044	2059	2360	2311	311	303	8774	0.911333	201	0.061	1	0.106671	0.0609189	Inf	no	1
TCGA-XP-A8T8	10	17	49	30	7	14	3	4	25	42	8	11	20	35	83	82	220	98	6	0	6	12	2	8	2	12	10	2078	2202	2396	2344	337	335	9020	0.709744	210	0.045	1	0.0851046	0.0446572	Inf	no	1
TCGA-Z6-A9VB	16	8	48	39	4	8	2	1	19	33	5	8	22	17	80	72	191	100	6	4	3	13	2	3	3	8	12	1850	1889	2010	2082	296	276	7831	0.844054	179	0.063	1	0.102465	0.0570145	Inf	no	1
