# Supplementary material for: Maftools: efficient and comprehensive analysis of somatic variants in cancer
Source: HighWire-hosted journal article supplement (doi:10.1101/gr.239244.118), 2018-10-19
Supplement: Supplemental_Table_S3.xlsx [file Supplemental_Table_S3.xlsx]

## Sheet: Supplemental_Table_S3
Supplemental Table S3: Gene enrichment analysis for identified signatures in ESCC
Hugo_Symbol	Group1	Group2	n_mutated_group1	n_mutated_group2	P-value	OR-Low	OR-High	Q-value
ZNF292	Signature_1	Rest	5 of 18	2 of 78	0.00228283	0	0.383556	0.923226
COL6A5	Signature_3	Rest	7 of 22	5 of 74	0.00504145	0	0.55014	0.923226
TGFBR2	Signature_2	Rest	9 of 56	0 of 40	0.00584321	0	0.49858	0.923226
SYNE1	Signature_3	Rest	7 of 22	6 of 74	0.00925613	0	0.638943	1
DYNC2H1	Signature_1	Rest	4 of 18	3 of 78	0.0218137	0	0.731404	1
EYS	Signature_3	Rest	4 of 22	2 of 74	0.0234952	0	0.74645	1
LTBP1	Signature_3	Rest	4 of 22	2 of 74	0.0234952	0	0.74645	1
DNAH3	Signature_3	Rest	5 of 22	4 of 74	0.0274747	0	0.817303	1
MAP1B	Signature_3	Rest	5 of 22	4 of 74	0.0274747	0	0.817303	1
RYR2	Signature_1	Rest	5 of 18	6 of 78	0.0299527	0	0.843492	1
AHNAK	Signature_1	Rest	4 of 18	4 of 78	0.0382724	0	0.902352	1
RELN	Signature_1	Rest	4 of 18	4 of 78	0.0382724	0	0.902352	1
CACNA1A	Signature_3	Rest	4 of 22	3 of 74	0.0462286	0	0.969478	1
DOCK2	Signature_3	Rest	4 of 22	3 of 74	0.0462286	0	0.969478	1
DPP10	Signature_3	Rest	4 of 22	3 of 74	0.0462286	0	0.969478	1
APOB	Signature_3	Rest	5 of 22	5 of 74	0.0462783	0	0.973696	1
FAT4	Signature_1	Rest	4 of 18	5 of 78	0.0604167	0	1.07712	1
ZNF750	Signature_1	Rest	4 of 18	5 of 78	0.0604167	0	1.07712	1
PTPRT	Signature_1	Rest	3 of 18	3 of 78	0.0776163	0	1.23356	1
AMOT	Signature_1	Rest	3 of 18	3 of 78	0.0776163	0	1.23356	1
MGAM	Signature_1	Rest	3 of 18	3 of 78	0.0776163	0	1.23356	1
OPA1	Signature_1	Rest	3 of 18	3 of 78	0.0776163	0	1.23356	1
PCDHA7	Signature_1	Rest	3 of 18	3 of 78	0.0776163	0	1.23356	1
RIMS2	Signature_1	Rest	3 of 18	3 of 78	0.0776163	0	1.23356	1
PLXNA2	Signature_2	Rest	7 of 56	1 of 40	0.080672	0	1.20022	1
HYDIN	Signature_1	Rest	4 of 18	6 of 78	0.088288	0	1.25626	1
TTN	Signature_3	Rest	13 of 22	30 of 74	0.0983868	0	1.18497	1
MUC16	Signature_1	Rest	6 of 18	13 of 78	0.10482	0	1.27442	1
HMCN1	Signature_3	Rest	4 of 22	5 of 74	0.118359	0	1.42991	1
LRP1B	Signature_3	Rest	4 of 22	5 of 74	0.118359	0	1.42991	1
CDH10	Signature_1	Rest	3 of 18	4 of 78	0.119468	0	1.52989	1
LRFN5	Signature_1	Rest	3 of 18	4 of 78	0.119468	0	1.52989	1
PLXND1	Signature_1	Rest	3 of 18	4 of 78	0.119468	0	1.52989	1
SPTA1	Signature_2	Rest	6 of 56	1 of 40	0.128419	0	1.48962	1
ZFHX4	Signature_2	Rest	6 of 56	1 of 40	0.128419	0	1.48962	1
PRDM9	Signature_2	Rest	6 of 56	1 of 40	0.128419	0	1.48962	1
FRYL	Signature_3	Rest	3 of 22	3 of 74	0.13118	0	1.61824	1
MYH13	Signature_3	Rest	3 of 22	3 of 74	0.13118	0	1.61824	1
SCN1A	Signature_3	Rest	3 of 22	3 of 74	0.13118	0	1.61824	1
ACACA	Signature_3	Rest	3 of 22	3 of 74	0.13118	0	1.61824	1
AMOT	Signature_3	Rest	3 of 22	3 of 74	0.13118	0	1.61824	1
DNAH9	Signature_3	Rest	3 of 22	3 of 74	0.13118	0	1.61824	1
DPP6	Signature_3	Rest	3 of 22	3 of 74	0.13118	0	1.61824	1
FRY	Signature_3	Rest	3 of 22	3 of 74	0.13118	0	1.61824	1
HERC2	Signature_3	Rest	3 of 22	3 of 74	0.13118	0	1.61824	1
LAMA5	Signature_3	Rest	3 of 22	3 of 74	0.13118	0	1.61824	1
LRBA	Signature_3	Rest	3 of 22	3 of 74	0.13118	0	1.61824	1
PAXIP1	Signature_3	Rest	3 of 22	3 of 74	0.13118	0	1.61824	1
PIGN	Signature_3	Rest	3 of 22	3 of 74	0.13118	0	1.61824	1
ZNF831	Signature_3	Rest	3 of 22	3 of 74	0.13118	0	1.61824	1
TP53	Signature_1	Rest	18 of 18	69 of 78	0.140654	0	1.66267	1
SYNE2	Signature_1	Rest	4 of 18	8 of 78	0.159908	0	1.62903	1
MLL2	Signature_3	Rest	7 of 22	14 of 74	0.160331	0	1.44992	1
ATM	Signature_3	Rest	4 of 22	6 of 74	0.166413	0	1.66913	1
PDS5B	Signature_1	Rest	3 of 18	5 of 78	0.168186	0	1.83338	1
TRRAP	Signature_1	Rest	3 of 18	5 of 78	0.168186	0	1.83338	1
FMN2	Signature_1	Rest	3 of 18	5 of 78	0.168186	0	1.83338	1
MED12L	Signature_1	Rest	3 of 18	5 of 78	0.168186	0	1.83338	1
DST	Signature_2	Rest	9 of 56	3 of 40	0.174714	0	1.54506	1
PAPPA2	Signature_2	Rest	7 of 56	2 of 40	0.189189	0	1.69594	1
CEP290	Signature_3	Rest	3 of 22	4 of 74	0.194893	0	2.00873	1
CMYA5	Signature_3	Rest	3 of 22	4 of 74	0.194893	0	2.00873	1
BAI3	Signature_3	Rest	3 of 22	4 of 74	0.194893	0	2.00873	1
DMD	Signature_3	Rest	3 of 22	4 of 74	0.194893	0	2.00873	1
DNAH10	Signature_3	Rest	3 of 22	4 of 74	0.194893	0	2.00873	1
NEB	Signature_3	Rest	3 of 22	4 of 74	0.194893	0	2.00873	1
DNAH7	Signature_2	Rest	5 of 56	1 of 40	0.19984	0	1.93545	1
HERC1	Signature_2	Rest	5 of 56	1 of 40	0.19984	0	1.93545	1
HUWE1	Signature_2	Rest	5 of 56	1 of 40	0.19984	0	1.93545	1
PLXNB2	Signature_2	Rest	5 of 56	1 of 40	0.19984	0	1.93545	1
PRKDC	Signature_2	Rest	5 of 56	1 of 40	0.19984	0	1.93545	1
NOTCH1	Signature_2	Rest	10 of 56	4 of 40	0.219068	0	1.64694	1
RYR2	Signature_3	Rest	4 of 22	7 of 74	0.220693	0	1.91505	1
HMCN1	Signature_1	Rest	3 of 18	6 of 78	0.22207	0	2.14482	1
MLL	Signature_1	Rest	3 of 18	6 of 78	0.22207	0	2.14482	1
MLL3	Signature_1	Rest	3 of 18	6 of 78	0.22207	0	2.14482	1
MDN1	Signature_1	Rest	3 of 18	6 of 78	0.22207	0	2.14482	1
CSMD3	Signature_3	Rest	6 of 22	13 of 74	0.237367	0	1.748	1
GPR98	Signature_2	Rest	8 of 56	3 of 40	0.243988	0	1.82446	1
PKHD1L1	Signature_1	Rest	4 of 18	10 of 78	0.248421	0	2.02316	1
NSD1	Signature_3	Rest	3 of 22	5 of 74	0.26505	0	2.40914	1
FMN2	Signature_3	Rest	3 of 22	5 of 74	0.26505	0	2.40914	1
HDAC4	Signature_3	Rest	3 of 22	5 of 74	0.26505	0	2.40914	1
ODZ4	Signature_3	Rest	3 of 22	5 of 74	0.26505	0	2.40914	1
SMARCA4	Signature_3	Rest	3 of 22	5 of 74	0.26505	0	2.40914	1
TCHH	Signature_3	Rest	3 of 22	5 of 74	0.26505	0	2.40914	1
USH2A	Signature_3	Rest	3 of 22	5 of 74	0.26505	0	2.40914	1
ATRNL1	Signature_2	Rest	6 of 56	2 of 40	0.271661	0	2.11339	1
LRP6	Signature_2	Rest	6 of 56	2 of 40	0.271661	0	2.11339	1
VPS13C	Signature_1	Rest	3 of 18	7 of 78	0.279406	0	2.46472	1
PCLO	Signature_3	Rest	4 of 22	8 of 74	0.279523	0	2.16818	1
FLG	Signature_2	Rest	9 of 56	4 of 40	0.293469	0	1.91239	1
DCHS2	Signature_1	Rest	2 of 18	4 of 78	0.313033	0	3.50951	1
UNC13C	Signature_1	Rest	2 of 18	4 of 78	0.313033	0	3.50951	1
CNTN6	Signature_1	Rest	2 of 18	4 of 78	0.313033	0	3.50951	1
DCC	Signature_1	Rest	2 of 18	4 of 78	0.313033	0	3.50951	1
BIRC6	Signature_1	Rest	2 of 18	4 of 78	0.313033	0	3.50951	1
CELSR2	Signature_1	Rest	2 of 18	4 of 78	0.313033	0	3.50951	1
CPAMD8	Signature_1	Rest	2 of 18	4 of 78	0.313033	0	3.50951	1
CSMD2	Signature_1	Rest	2 of 18	4 of 78	0.313033	0	3.50951	1
DNAH9	Signature_1	Rest	2 of 18	4 of 78	0.313033	0	3.50951	1
FAM135A	Signature_1	Rest	2 of 18	4 of 78	0.313033	0	3.50951	1
KIF20B	Signature_1	Rest	2 of 18	4 of 78	0.313033	0	3.50951	1
NAV3	Signature_1	Rest	2 of 18	4 of 78	0.313033	0	3.50951	1
SORCS1	Signature_1	Rest	2 of 18	4 of 78	0.313033	0	3.50951	1
SPEN	Signature_1	Rest	2 of 18	4 of 78	0.313033	0	3.50951	1
STXBP5L	Signature_1	Rest	2 of 18	4 of 78	0.313033	0	3.50951	1
VPS13B	Signature_1	Rest	2 of 18	4 of 78	0.313033	0	3.50951	1
COL11A1	Signature_2	Rest	7 of 56	3 of 40	0.331383	0	2.20607	1
FAT3	Signature_2	Rest	7 of 56	3 of 40	0.331383	0	2.20607	1
CACNA1C	Signature_3	Rest	3 of 22	6 of 74	0.338395	0	2.82064	1
CNTNAP5	Signature_3	Rest	3 of 22	6 of 74	0.338395	0	2.82064	1
FAT4	Signature_3	Rest	3 of 22	6 of 74	0.338395	0	2.82064	1
FSIP2	Signature_3	Rest	3 of 22	6 of 74	0.338395	0	2.82064	1
MDN1	Signature_3	Rest	3 of 22	6 of 74	0.338395	0	2.82064	1
NOTCH3	Signature_3	Rest	3 of 22	6 of 74	0.338395	0	2.82064	1
SPTBN4	Signature_3	Rest	3 of 22	6 of 74	0.338395	0	2.82064	1
ZNF750	Signature_3	Rest	3 of 22	6 of 74	0.338395	0	2.82064	1
NFE2L2	Signature_2	Rest	10 of 56	5 of 40	0.338472	0	1.97749	1
MUC17	Signature_1	Rest	3 of 18	8 of 78	0.338574	0	2.79339	1
OBSCN	Signature_3	Rest	4 of 22	9 of 74	0.341155	0	2.42887	1
FAM135B	Signature_2	Rest	5 of 56	2 of 40	0.378391	0	2.76074	1
AHNAK2	Signature_2	Rest	5 of 56	2 of 40	0.378391	0	2.76074	1
CREBBP	Signature_2	Rest	5 of 56	2 of 40	0.378391	0	2.76074	1
GNAS	Signature_2	Rest	5 of 56	2 of 40	0.378391	0	2.76074	1
DNAH5	Signature_2	Rest	11 of 56	6 of 40	0.379747	0	2.02897	1
KIF26B	Signature_1	Rest	2 of 18	5 of 78	0.390459	0	4.23085	1
AHNAK2	Signature_1	Rest	2 of 18	5 of 78	0.390459	0	4.23085	1
CEP290	Signature_1	Rest	2 of 18	5 of 78	0.390459	0	4.23085	1
ASXL1	Signature_1	Rest	2 of 18	5 of 78	0.390459	0	4.23085	1
BAI3	Signature_1	Rest	2 of 18	5 of 78	0.390459	0	4.23085	1
DIDO1	Signature_1	Rest	2 of 18	5 of 78	0.390459	0	4.23085	1
MACF1	Signature_1	Rest	3 of 18	9 of 78	0.39813	0	3.13155	1
ZNF804B	Signature_1	Rest	3 of 18	9 of 78	0.39813	0	3.13155	1
HYDIN	Signature_3	Rest	3 of 22	7 of 74	0.412102	0	3.24407	1
DCHS2	Signature_3	Rest	2 of 22	4 of 74	0.417891	0	4.56767	1
MUC5B	Signature_3	Rest	2 of 22	4 of 74	0.417891	0	4.56767	1
ABCA13	Signature_3	Rest	2 of 22	4 of 74	0.417891	0	4.56767	1
CNTN6	Signature_3	Rest	2 of 22	4 of 74	0.417891	0	4.56767	1
DCC	Signature_3	Rest	2 of 22	4 of 74	0.417891	0	4.56767	1
ACACB	Signature_3	Rest	2 of 22	4 of 74	0.417891	0	4.56767	1
C1orf129	Signature_3	Rest	2 of 22	4 of 74	0.417891	0	4.56767	1
CEP152	Signature_3	Rest	2 of 22	4 of 74	0.417891	0	4.56767	1
EP300	Signature_3	Rest	2 of 22	4 of 74	0.417891	0	4.56767	1
FLNC	Signature_3	Rest	2 of 22	4 of 74	0.417891	0	4.56767	1
MYH2	Signature_3	Rest	2 of 22	4 of 74	0.417891	0	4.56767	1
PDZD2	Signature_3	Rest	2 of 22	4 of 74	0.417891	0	4.56767	1
RP1	Signature_3	Rest	2 of 22	4 of 74	0.417891	0	4.56767	1
RUNX1T1	Signature_3	Rest	2 of 22	4 of 74	0.417891	0	4.56767	1
SETD2	Signature_3	Rest	2 of 22	4 of 74	0.417891	0	4.56767	1
SORCS1	Signature_3	Rest	2 of 22	4 of 74	0.417891	0	4.56767	1
SPEF2	Signature_3	Rest	2 of 22	4 of 74	0.417891	0	4.56767	1
SPEN	Signature_3	Rest	2 of 22	4 of 74	0.417891	0	4.56767	1
USP34	Signature_3	Rest	2 of 22	4 of 74	0.417891	0	4.56767	1
PTCH1	Signature_2	Rest	6 of 56	3 of 40	0.436607	0	2.75656	1
DNAH8	Signature_2	Rest	6 of 56	3 of 40	0.436607	0	2.75656	1
SPTBN4	Signature_2	Rest	6 of 56	3 of 40	0.436607	0	2.75656	1
XIRP2	Signature_2	Rest	6 of 56	3 of 40	0.436607	0	2.75656	1
PIK3CA	Signature_1	Rest	3 of 18	10 of 78	0.456834	0	3.47965	1
PCDH15	Signature_1	Rest	2 of 18	6 of 78	0.464551	0	4.97164	1
CSMD1	Signature_1	Rest	2 of 18	6 of 78	0.464551	0	4.97164	1
ODZ4	Signature_1	Rest	2 of 18	6 of 78	0.464551	0	4.97164	1
SACS	Signature_1	Rest	2 of 18	6 of 78	0.464551	0	4.97164	1
USH2A	Signature_1	Rest	2 of 18	6 of 78	0.464551	0	4.97164	1
CSMD3	Signature_1	Rest	4 of 18	15 of 78	0.49906	0	3.11735	1
KIF26B	Signature_3	Rest	2 of 22	5 of 74	0.507089	0	5.51101	1
CDH10	Signature_3	Rest	2 of 22	5 of 74	0.507089	0	5.51101	1
CREBBP	Signature_3	Rest	2 of 22	5 of 74	0.507089	0	5.51101	1
DYNC2H1	Signature_3	Rest	2 of 22	5 of 74	0.507089	0	5.51101	1
LRFN5	Signature_3	Rest	2 of 22	5 of 74	0.507089	0	5.51101	1
ZNF292	Signature_3	Rest	2 of 22	5 of 74	0.507089	0	5.51101	1
MUC5B	Signature_2	Rest	4 of 56	2 of 40	0.50887	0	3.8865	1
FAT2	Signature_2	Rest	4 of 56	2 of 40	0.50887	0	3.8865	1
NCKAP5	Signature_2	Rest	4 of 56	2 of 40	0.50887	0	3.8865	1
UNC13C	Signature_2	Rest	4 of 56	2 of 40	0.50887	0	3.8865	1
LRRIQ1	Signature_2	Rest	4 of 56	2 of 40	0.50887	0	3.8865	1
PLEC	Signature_2	Rest	4 of 56	2 of 40	0.50887	0	3.8865	1
ACACB	Signature_2	Rest	4 of 56	2 of 40	0.50887	0	3.8865	1
CELSR2	Signature_2	Rest	4 of 56	2 of 40	0.50887	0	3.8865	1
DOCK10	Signature_2	Rest	4 of 56	2 of 40	0.50887	0	3.8865	1
FAM135A	Signature_2	Rest	4 of 56	2 of 40	0.50887	0	3.8865	1
FLNC	Signature_2	Rest	4 of 56	2 of 40	0.50887	0	3.8865	1
MYO18B	Signature_2	Rest	4 of 56	2 of 40	0.50887	0	3.8865	1
PCDH11X	Signature_2	Rest	4 of 56	2 of 40	0.50887	0	3.8865	1
PDZD2	Signature_2	Rest	4 of 56	2 of 40	0.50887	0	3.8865	1
RTN1	Signature_2	Rest	4 of 56	2 of 40	0.50887	0	3.8865	1
RYR1	Signature_2	Rest	4 of 56	2 of 40	0.50887	0	3.8865	1
SETD2	Signature_2	Rest	4 of 56	2 of 40	0.50887	0	3.8865	1
STXBP5L	Signature_2	Rest	4 of 56	2 of 40	0.50887	0	3.8865	1
TNN	Signature_2	Rest	4 of 56	2 of 40	0.50887	0	3.8865	1
USP34	Signature_2	Rest	4 of 56	2 of 40	0.50887	0	3.8865	1
WDR81	Signature_2	Rest	4 of 56	2 of 40	0.50887	0	3.8865	1
OBSCN	Signature_2	Rest	8 of 56	5 of 40	0.52504	0	2.7196	1
RNF213	Signature_1	Rest	2 of 18	7 of 78	0.533831	0	5.73296	1
CACNA1C	Signature_1	Rest	2 of 18	7 of 78	0.533831	0	5.73296	1
DNAH3	Signature_1	Rest	2 of 18	7 of 78	0.533831	0	5.73296	1
LRP1B	Signature_1	Rest	2 of 18	7 of 78	0.533831	0	5.73296	1
CSMD1	Signature_2	Rest	5 of 56	3 of 40	0.556273	0	3.61428	1
FREM2	Signature_2	Rest	5 of 56	3 of 40	0.556273	0	3.61428	1
KALRN	Signature_2	Rest	5 of 56	3 of 40	0.556273	0	3.61428	1
SACS	Signature_2	Rest	5 of 56	3 of 40	0.556273	0	3.61428	1
SMARCA4	Signature_2	Rest	5 of 56	3 of 40	0.556273	0	3.61428	1
TCHH	Signature_2	Rest	5 of 56	3 of 40	0.556273	0	3.61428	1
TP53	Signature_2	Rest	51 of 56	36 of 40	0.563393	0	3.71197	1
DNAH5	Signature_3	Rest	4 of 22	13 of 74	0.584624	0	3.55669	1
PCDH15	Signature_3	Rest	2 of 22	6 of 74	0.587769	0	6.48135	1
PDS5B	Signature_3	Rest	2 of 22	6 of 74	0.587769	0	6.48135	1
TRRAP	Signature_3	Rest	2 of 22	6 of 74	0.587769	0	6.48135	1
FREM2	Signature_3	Rest	2 of 22	6 of 74	0.587769	0	6.48135	1
KALRN	Signature_3	Rest	2 of 22	6 of 74	0.587769	0	6.48135	1
LRP6	Signature_3	Rest	2 of 22	6 of 74	0.587769	0	6.48135	1
MED12L	Signature_3	Rest	2 of 22	6 of 74	0.587769	0	6.48135	1
RELN	Signature_3	Rest	2 of 22	6 of 74	0.587769	0	6.48135	1
VPS13C	Signature_2	Rest	6 of 56	4 of 40	0.594442	0	3.4286	1
ATM	Signature_1	Rest	2 of 18	8 of 78	0.597437	0	6.51582	1
FAT3	Signature_1	Rest	2 of 18	8 of 78	0.597437	0	6.51582	1
TTN	Signature_1	Rest	8 of 18	35 of 78	0.613883	0	2.78336	1
PIK3CA	Signature_3	Rest	3 of 22	10 of 74	0.615252	0	4.5922	1
FLG	Signature_3	Rest	3 of 22	10 of 74	0.615252	0	4.5922	1
MUC16	Signature_2	Rest	11 of 56	8 of 40	0.621847	0	2.69099	1
MACF1	Signature_2	Rest	7 of 56	5 of 40	0.62683	0	3.29767	1
ZNF804B	Signature_2	Rest	7 of 56	5 of 40	0.62683	0	3.29767	1
PKHD1L1	Signature_2	Rest	8 of 56	6 of 40	0.655241	0	3.20354	1
PTCH1	Signature_3	Rest	2 of 22	7 of 74	0.659019	0	7.48022	1
RNF213	Signature_3	Rest	2 of 22	7 of 74	0.659019	0	7.48022	1
DNAH8	Signature_3	Rest	2 of 22	7 of 74	0.659019	0	7.48022	1
XIRP2	Signature_3	Rest	2 of 22	7 of 74	0.659019	0	7.48022	1
NOTCH1	Signature_3	Rest	3 of 22	11 of 74	0.672894	0	5.07012	1
ASXL1	Signature_2	Rest	4 of 56	3 of 40	0.682843	0	5.11489	1
DIDO1	Signature_2	Rest	4 of 56	3 of 40	0.682843	0	5.11489	1
DMD	Signature_2	Rest	4 of 56	3 of 40	0.682843	0	5.11489	1
MLL	Signature_2	Rest	5 of 56	4 of 40	0.705856	0	4.50736	1
MLL3	Signature_2	Rest	5 of 56	4 of 40	0.705856	0	4.50736	1
RNF213	Signature_2	Rest	5 of 56	4 of 40	0.705856	0	4.50736	1
CNTNAP5	Signature_2	Rest	5 of 56	4 of 40	0.705856	0	4.50736	1
FSIP2	Signature_2	Rest	5 of 56	4 of 40	0.705856	0	4.50736	1
NOTCH3	Signature_2	Rest	5 of 56	4 of 40	0.705856	0	4.50736	1
DST	Signature_1	Rest	2 of 18	10 of 78	0.706329	0	8.15032	1
PCLO	Signature_1	Rest	2 of 18	10 of 78	0.706329	0	8.15032	1
COL6A5	Signature_1	Rest	2 of 18	10 of 78	0.706329	0	8.15032	1
COL11A1	Signature_3	Rest	2 of 22	8 of 74	0.720748	0	8.5091	1
FAT2	Signature_1	Rest	1 of 18	5 of 78	0.722936	0	28.6792	1
NCKAP5	Signature_1	Rest	1 of 18	5 of 78	0.722936	0	28.6792	1
ABCA13	Signature_1	Rest	1 of 18	5 of 78	0.722936	0	28.6792	1
FRYL	Signature_1	Rest	1 of 18	5 of 78	0.722936	0	28.6792	1
LRRIQ1	Signature_1	Rest	1 of 18	5 of 78	0.722936	0	28.6792	1
MYH13	Signature_1	Rest	1 of 18	5 of 78	0.722936	0	28.6792	1
PLEC	Signature_1	Rest	1 of 18	5 of 78	0.722936	0	28.6792	1
SCN1A	Signature_1	Rest	1 of 18	5 of 78	0.722936	0	28.6792	1
C1orf129	Signature_1	Rest	1 of 18	5 of 78	0.722936	0	28.6792	1
CEP152	Signature_1	Rest	1 of 18	5 of 78	0.722936	0	28.6792	1
DNAH7	Signature_1	Rest	1 of 18	5 of 78	0.722936	0	28.6792	1
DOCK10	Signature_1	Rest	1 of 18	5 of 78	0.722936	0	28.6792	1
DPP6	Signature_1	Rest	1 of 18	5 of 78	0.722936	0	28.6792	1
EP300	Signature_1	Rest	1 of 18	5 of 78	0.722936	0	28.6792	1
FRY	Signature_1	Rest	1 of 18	5 of 78	0.722936	0	28.6792	1
HERC1	Signature_1	Rest	1 of 18	5 of 78	0.722936	0	28.6792	1
HERC2	Signature_1	Rest	1 of 18	5 of 78	0.722936	0	28.6792	1
HUWE1	Signature_1	Rest	1 of 18	5 of 78	0.722936	0	28.6792	1
LAMA5	Signature_1	Rest	1 of 18	5 of 78	0.722936	0	28.6792	1
MYH2	Signature_1	Rest	1 of 18	5 of 78	0.722936	0	28.6792	1
MYO18B	Signature_1	Rest	1 of 18	5 of 78	0.722936	0	28.6792	1
PAXIP1	Signature_1	Rest	1 of 18	5 of 78	0.722936	0	28.6792	1
PCDH11X	Signature_1	Rest	1 of 18	5 of 78	0.722936	0	28.6792	1
PIGN	Signature_1	Rest	1 of 18	5 of 78	0.722936	0	28.6792	1
PRKDC	Signature_1	Rest	1 of 18	5 of 78	0.722936	0	28.6792	1
RP1	Signature_1	Rest	1 of 18	5 of 78	0.722936	0	28.6792	1
RTN1	Signature_1	Rest	1 of 18	5 of 78	0.722936	0	28.6792	1
RUNX1T1	Signature_1	Rest	1 of 18	5 of 78	0.722936	0	28.6792	1
RYR1	Signature_1	Rest	1 of 18	5 of 78	0.722936	0	28.6792	1
SPEF2	Signature_1	Rest	1 of 18	5 of 78	0.722936	0	28.6792	1
TNN	Signature_1	Rest	1 of 18	5 of 78	0.722936	0	28.6792	1
WDR81	Signature_1	Rest	1 of 18	5 of 78	0.722936	0	28.6792	1
NFE2L2	Signature_3	Rest	3 of 22	12 of 74	0.724561	0	5.56339	1
MUC17	Signature_2	Rest	6 of 56	5 of 40	0.726584	0	4.1353	1
PIK3CA	Signature_2	Rest	7 of 56	6 of 40	0.745584	0	3.88818	1
MUC17	Signature_3	Rest	2 of 22	9 of 74	0.773386	0	9.56836	1
GPR98	Signature_3	Rest	2 of 22	9 of 74	0.773386	0	9.56836	1
FAM135B	Signature_1	Rest	1 of 18	6 of 78	0.778349	0	33.9747	1
CMYA5	Signature_1	Rest	1 of 18	6 of 78	0.778349	0	33.9747	1
DNAH10	Signature_1	Rest	1 of 18	6 of 78	0.778349	0	33.9747	1
DOCK2	Signature_1	Rest	1 of 18	6 of 78	0.778349	0	33.9747	1
DPP10	Signature_1	Rest	1 of 18	6 of 78	0.778349	0	33.9747	1
GNAS	Signature_1	Rest	1 of 18	6 of 78	0.778349	0	33.9747	1
NEB	Signature_1	Rest	1 of 18	6 of 78	0.778349	0	33.9747	1
FAT2	Signature_3	Rest	1 of 22	5 of 74	0.800171	0	37.1276	1
NCKAP5	Signature_3	Rest	1 of 22	5 of 74	0.800171	0	37.1276	1
LRRIQ1	Signature_3	Rest	1 of 22	5 of 74	0.800171	0	37.1276	1
PLEC	Signature_3	Rest	1 of 22	5 of 74	0.800171	0	37.1276	1
BIRC6	Signature_3	Rest	1 of 22	5 of 74	0.800171	0	37.1276	1
CPAMD8	Signature_3	Rest	1 of 22	5 of 74	0.800171	0	37.1276	1
CSMD2	Signature_3	Rest	1 of 22	5 of 74	0.800171	0	37.1276	1
DOCK10	Signature_3	Rest	1 of 22	5 of 74	0.800171	0	37.1276	1
KIF20B	Signature_3	Rest	1 of 22	5 of 74	0.800171	0	37.1276	1
MYO18B	Signature_3	Rest	1 of 22	5 of 74	0.800171	0	37.1276	1
NAV3	Signature_3	Rest	1 of 22	5 of 74	0.800171	0	37.1276	1
OPA1	Signature_3	Rest	1 of 22	5 of 74	0.800171	0	37.1276	1
PCDH11X	Signature_3	Rest	1 of 22	5 of 74	0.800171	0	37.1276	1
PLXNB2	Signature_3	Rest	1 of 22	5 of 74	0.800171	0	37.1276	1
RIMS2	Signature_3	Rest	1 of 22	5 of 74	0.800171	0	37.1276	1
RTN1	Signature_3	Rest	1 of 22	5 of 74	0.800171	0	37.1276	1
RYR1	Signature_3	Rest	1 of 22	5 of 74	0.800171	0	37.1276	1
TNN	Signature_3	Rest	1 of 22	5 of 74	0.800171	0	37.1276	1
VPS13B	Signature_3	Rest	1 of 22	5 of 74	0.800171	0	37.1276	1
WDR81	Signature_3	Rest	1 of 22	5 of 74	0.800171	0	37.1276	1
ABCA13	Signature_2	Rest	3 of 56	3 of 40	0.804296	0	8.30169	1
PTPRT	Signature_2	Rest	3 of 56	3 of 40	0.804296	0	8.30169	1
ACACA	Signature_2	Rest	3 of 56	3 of 40	0.804296	0	8.30169	1
BIRC6	Signature_2	Rest	3 of 56	3 of 40	0.804296	0	8.30169	1
C1orf129	Signature_2	Rest	3 of 56	3 of 40	0.804296	0	8.30169	1
CEP152	Signature_2	Rest	3 of 56	3 of 40	0.804296	0	8.30169	1
CPAMD8	Signature_2	Rest	3 of 56	3 of 40	0.804296	0	8.30169	1
CSMD2	Signature_2	Rest	3 of 56	3 of 40	0.804296	0	8.30169	1
EP300	Signature_2	Rest	3 of 56	3 of 40	0.804296	0	8.30169	1
KIF20B	Signature_2	Rest	3 of 56	3 of 40	0.804296	0	8.30169	1
LRBA	Signature_2	Rest	3 of 56	3 of 40	0.804296	0	8.30169	1
MGAM	Signature_2	Rest	3 of 56	3 of 40	0.804296	0	8.30169	1
MYH2	Signature_2	Rest	3 of 56	3 of 40	0.804296	0	8.30169	1
NAV3	Signature_2	Rest	3 of 56	3 of 40	0.804296	0	8.30169	1
PCDHA7	Signature_2	Rest	3 of 56	3 of 40	0.804296	0	8.30169	1
RP1	Signature_2	Rest	3 of 56	3 of 40	0.804296	0	8.30169	1
RUNX1T1	Signature_2	Rest	3 of 56	3 of 40	0.804296	0	8.30169	1
SPEF2	Signature_2	Rest	3 of 56	3 of 40	0.804296	0	8.30169	1
VPS13B	Signature_2	Rest	3 of 56	3 of 40	0.804296	0	8.30169	1
ZNF831	Signature_2	Rest	3 of 56	3 of 40	0.804296	0	8.30169	1
NSD1	Signature_2	Rest	4 of 56	4 of 40	0.809413	0	6.40216	1
PCDH15	Signature_2	Rest	4 of 56	4 of 40	0.809413	0	6.40216	1
HDAC4	Signature_2	Rest	4 of 56	4 of 40	0.809413	0	6.40216	1
MLL2	Signature_2	Rest	11 of 56	10 of 40	0.809938	0	3.4427	1
MLL2	Signature_1	Rest	3 of 18	18 of 78	0.81618	0	6.68214	1
SYNE2	Signature_3	Rest	2 of 22	10 of 74	0.817663	0	10.6662	1
MACF1	Signature_3	Rest	2 of 22	10 of 74	0.817663	0	10.6662	1
ZNF804B	Signature_3	Rest	2 of 22	10 of 74	0.817663	0	10.6662	1
NSD1	Signature_1	Rest	1 of 18	7 of 78	0.823177	0	39.3983	1
ATRNL1	Signature_1	Rest	1 of 18	7 of 78	0.823177	0	39.3983	1
FREM2	Signature_1	Rest	1 of 18	7 of 78	0.823177	0	39.3983	1
HDAC4	Signature_1	Rest	1 of 18	7 of 78	0.823177	0	39.3983	1
KALRN	Signature_1	Rest	1 of 18	7 of 78	0.823177	0	39.3983	1
PLXNA2	Signature_1	Rest	1 of 18	7 of 78	0.823177	0	39.3983	1
NFE2L2	Signature_1	Rest	2 of 18	13 of 78	0.825746	0	10.794	1
PCLO	Signature_2	Rest	6 of 56	6 of 40	0.826338	0	4.88194	1
SYNE2	Signature_2	Rest	6 of 56	6 of 40	0.826338	0	4.88194	1
FAM135B	Signature_3	Rest	1 of 22	6 of 74	0.849018	0	43.9868	1
SPTA1	Signature_3	Rest	1 of 22	6 of 74	0.849018	0	43.9868	1
ZFHX4	Signature_3	Rest	1 of 22	6 of 74	0.849018	0	43.9868	1
ASXL1	Signature_3	Rest	1 of 22	6 of 74	0.849018	0	43.9868	1
DIDO1	Signature_3	Rest	1 of 22	6 of 74	0.849018	0	43.9868	1
GNAS	Signature_3	Rest	1 of 22	6 of 74	0.849018	0	43.9868	1
PLXND1	Signature_3	Rest	1 of 22	6 of 74	0.849018	0	43.9868	1
PRDM9	Signature_3	Rest	1 of 22	6 of 74	0.849018	0	43.9868	1
PTCH1	Signature_1	Rest	1 of 18	8 of 78	0.859346	0	44.9784	1
CNTNAP5	Signature_1	Rest	1 of 18	8 of 78	0.859346	0	44.9784	1
DNAH8	Signature_1	Rest	1 of 18	8 of 78	0.859346	0	44.9784	1
FSIP2	Signature_1	Rest	1 of 18	8 of 78	0.859346	0	44.9784	1
NOTCH3	Signature_1	Rest	1 of 18	8 of 78	0.859346	0	44.9784	1
PAPPA2	Signature_1	Rest	1 of 18	8 of 78	0.859346	0	44.9784	1
XIRP2	Signature_1	Rest	1 of 18	8 of 78	0.859346	0	44.9784	1
DNAH5	Signature_1	Rest	2 of 18	15 of 78	0.880538	0	12.6923	1
PKHD1L1	Signature_3	Rest	2 of 22	12 of 74	0.884727	0	12.957	1
AHNAK	Signature_3	Rest	1 of 22	7 of 74	0.88634	0	51.0533	1
ATRNL1	Signature_3	Rest	1 of 22	7 of 74	0.88634	0	51.0533	1
CSMD1	Signature_3	Rest	1 of 22	7 of 74	0.88634	0	51.0533	1
SACS	Signature_3	Rest	1 of 22	7 of 74	0.88634	0	51.0533	1
APOB	Signature_1	Rest	1 of 18	9 of 78	0.888446	0	50.7218	1
COL11A1	Signature_1	Rest	1 of 18	9 of 78	0.888446	0	50.7218	1
CACNA1C	Signature_2	Rest	4 of 56	5 of 40	0.892259	0	7.75868	1
MAP1B	Signature_2	Rest	4 of 56	5 of 40	0.892259	0	7.75868	1
KIF26B	Signature_2	Rest	3 of 56	4 of 40	0.895385	0	10.4453	1
CMYA5	Signature_2	Rest	3 of 56	4 of 40	0.895385	0	10.4453	1
CACNA1A	Signature_2	Rest	3 of 56	4 of 40	0.895385	0	10.4453	1
DNAH10	Signature_2	Rest	3 of 56	4 of 40	0.895385	0	10.4453	1
NEB	Signature_2	Rest	3 of 56	4 of 40	0.895385	0	10.4453	1
PLXND1	Signature_2	Rest	3 of 56	4 of 40	0.895385	0	10.4453	1
CSMD3	Signature_2	Rest	9 of 56	10 of 40	0.909609	0	4.60224	1
GPR98	Signature_1	Rest	1 of 18	10 of 78	0.911795	0	56.6357	1
MLL	Signature_3	Rest	1 of 22	8 of 74	0.914755	0	58.3363	1
MLL3	Signature_3	Rest	1 of 22	8 of 74	0.914755	0	58.3363	1
PAPPA2	Signature_3	Rest	1 of 22	8 of 74	0.914755	0	58.3363	1
TTN	Signature_2	Rest	22 of 56	21 of 40	0.932152	0	3.67704	1
FAT3	Signature_3	Rest	1 of 22	9 of 74	0.936311	0	65.8459	1
VPS13C	Signature_3	Rest	1 of 22	9 of 74	0.936311	0	65.8459	1
APOB	Signature_2	Rest	4 of 56	6 of 40	0.942252	0	9.19293	1
ATM	Signature_2	Rest	4 of 56	6 of 40	0.942252	0	9.19293	1
SYNE1	Signature_1	Rest	1 of 18	12 of 78	0.945372	0	69.006	1
FLG	Signature_1	Rest	1 of 18	12 of 78	0.945372	0	69.006	1
OBSCN	Signature_1	Rest	1 of 18	12 of 78	0.945372	0	69.006	1
AHNAK	Signature_2	Rest	3 of 56	5 of 40	0.946968	0	12.7059	1
PDS5B	Signature_2	Rest	3 of 56	5 of 40	0.946968	0	12.7059	1
TRRAP	Signature_2	Rest	3 of 56	5 of 40	0.946968	0	12.7059	1
MED12L	Signature_2	Rest	3 of 56	5 of 40	0.946968	0	12.7059	1
ODZ4	Signature_2	Rest	3 of 56	5 of 40	0.946968	0	12.7059	1
USH2A	Signature_2	Rest	3 of 56	5 of 40	0.946968	0	12.7059	1
DCHS2	Signature_2	Rest	2 of 56	4 of 40	0.956111	0	23.1452	1
CNTN6	Signature_2	Rest	2 of 56	4 of 40	0.956111	0	23.1452	1
DCC	Signature_2	Rest	2 of 56	4 of 40	0.956111	0	23.1452	1
EYS	Signature_2	Rest	2 of 56	4 of 40	0.956111	0	23.1452	1
FRYL	Signature_2	Rest	2 of 56	4 of 40	0.956111	0	23.1452	1
MYH13	Signature_2	Rest	2 of 56	4 of 40	0.956111	0	23.1452	1
SCN1A	Signature_2	Rest	2 of 56	4 of 40	0.956111	0	23.1452	1
DPP6	Signature_2	Rest	2 of 56	4 of 40	0.956111	0	23.1452	1
FRY	Signature_2	Rest	2 of 56	4 of 40	0.956111	0	23.1452	1
HERC2	Signature_2	Rest	2 of 56	4 of 40	0.956111	0	23.1452	1
LAMA5	Signature_2	Rest	2 of 56	4 of 40	0.956111	0	23.1452	1
LTBP1	Signature_2	Rest	2 of 56	4 of 40	0.956111	0	23.1452	1
OPA1	Signature_2	Rest	2 of 56	4 of 40	0.956111	0	23.1452	1
PAXIP1	Signature_2	Rest	2 of 56	4 of 40	0.956111	0	23.1452	1
PIGN	Signature_2	Rest	2 of 56	4 of 40	0.956111	0	23.1452	1
RIMS2	Signature_2	Rest	2 of 56	4 of 40	0.956111	0	23.1452	1
SORCS1	Signature_2	Rest	2 of 56	4 of 40	0.956111	0	23.1452	1
SPEN	Signature_2	Rest	2 of 56	4 of 40	0.956111	0	23.1452	1
NOTCH1	Signature_1	Rest	1 of 18	13 of 78	0.957219	0	75.479	1
DST	Signature_3	Rest	1 of 22	11 of 74	0.964871	0	81.5879	1
MUC16	Signature_3	Rest	2 of 22	17 of 74	0.967715	0	19.3948	1
SYNE1	Signature_2	Rest	5 of 56	8 of 40	0.968334	0	8.61151	1
TP53	Signature_3	Rest	18 of 22	69 of 74	0.972525	0	12.4436	1
LRP1B	Signature_2	Rest	3 of 56	6 of 40	0.974323	0	15.1	1
MDN1	Signature_2	Rest	3 of 56	6 of 40	0.974323	0	15.1	1
CEP290	Signature_2	Rest	2 of 56	5 of 40	0.980402	0	28.3064	1
BAI3	Signature_2	Rest	2 of 56	5 of 40	0.980402	0	28.3064	1
CDH10	Signature_2	Rest	2 of 56	5 of 40	0.980402	0	28.3064	1
DOCK2	Signature_2	Rest	2 of 56	5 of 40	0.980402	0	28.3064	1
DPP10	Signature_2	Rest	2 of 56	5 of 40	0.980402	0	28.3064	1
LRFN5	Signature_2	Rest	2 of 56	5 of 40	0.980402	0	28.3064	1
HYDIN	Signature_2	Rest	3 of 56	7 of 40	0.988068	0	17.6354	1
FMN2	Signature_2	Rest	2 of 56	6 of 40	0.991546	0	33.8309	1
RELN	Signature_2	Rest	2 of 56	6 of 40	0.991546	0	33.8309	1
DNAH9	Signature_2	Rest	1 of 56	5 of 40	0.99586	0	186.775	1
HMCN1	Signature_2	Rest	2 of 56	7 of 40	0.996467	0	39.567	1
DNAH3	Signature_2	Rest	2 of 56	7 of 40	0.996467	0	39.567	1
FAT4	Signature_2	Rest	2 of 56	7 of 40	0.996467	0	39.567	1
ZNF750	Signature_2	Rest	2 of 56	7 of 40	0.996467	0	39.567	1
COL6A5	Signature_2	Rest	3 of 56	9 of 40	0.997694	0	23.2013	1
DYNC2H1	Signature_2	Rest	1 of 56	6 of 40	0.998436	0	224.599	1
RYR2	Signature_2	Rest	2 of 56	9 of 40	0.999436	0	52.3665	1
MAP1B	Signature_1	Rest	0 of 18	9 of 78	1	0	Inf	1
SPTBN4	Signature_1	Rest	0 of 18	9 of 78	1	0	Inf	1
TGFBR2	Signature_1	Rest	0 of 18	9 of 78	1	0	Inf	1
TGFBR2	Signature_3	Rest	0 of 22	9 of 74	1	0	Inf	1
LRP6	Signature_1	Rest	0 of 18	8 of 78	1	0	Inf	1
PLXNA2	Signature_3	Rest	0 of 22	8 of 74	1	0	Inf	1
SMARCA4	Signature_1	Rest	0 of 18	8 of 78	1	0	Inf	1
TCHH	Signature_1	Rest	0 of 18	8 of 78	1	0	Inf	1
AHNAK2	Signature_3	Rest	0 of 22	7 of 74	1	0	Inf	1
SPTA1	Signature_1	Rest	0 of 18	7 of 78	1	0	Inf	1
ZFHX4	Signature_1	Rest	0 of 18	7 of 78	1	0	Inf	1
CACNA1A	Signature_1	Rest	0 of 18	7 of 78	1	0	Inf	1
CREBBP	Signature_1	Rest	0 of 18	7 of 78	1	0	Inf	1
DMD	Signature_1	Rest	0 of 18	7 of 78	1	0	Inf	1
PRDM9	Signature_1	Rest	0 of 18	7 of 78	1	0	Inf	1
ZNF292	Signature_2	Rest	0 of 56	7 of 40	1	0	Inf	1
MUC5B	Signature_1	Rest	0 of 18	6 of 78	1	0	Inf	1
UNC13C	Signature_3	Rest	0 of 22	6 of 74	1	0	Inf	1
EYS	Signature_1	Rest	0 of 18	6 of 78	1	0	Inf	1
PTPRT	Signature_3	Rest	0 of 22	6 of 74	1	0	Inf	1
ACACA	Signature_1	Rest	0 of 18	6 of 78	1	0	Inf	1
ACACB	Signature_1	Rest	0 of 18	6 of 78	1	0	Inf	1
AMOT	Signature_2	Rest	0 of 56	6 of 40	1	0	Inf	1
CELSR2	Signature_3	Rest	0 of 22	6 of 74	1	0	Inf	1
DNAH7	Signature_3	Rest	0 of 22	6 of 74	1	0	Inf	1
FAM135A	Signature_3	Rest	0 of 22	6 of 74	1	0	Inf	1
FLNC	Signature_1	Rest	0 of 18	6 of 78	1	0	Inf	1
HERC1	Signature_3	Rest	0 of 22	6 of 74	1	0	Inf	1
HUWE1	Signature_3	Rest	0 of 22	6 of 74	1	0	Inf	1
LRBA	Signature_1	Rest	0 of 18	6 of 78	1	0	Inf	1
LTBP1	Signature_1	Rest	0 of 18	6 of 78	1	0	Inf	1
MGAM	Signature_3	Rest	0 of 22	6 of 74	1	0	Inf	1
PCDHA7	Signature_3	Rest	0 of 22	6 of 74	1	0	Inf	1
PDZD2	Signature_1	Rest	0 of 18	6 of 78	1	0	Inf	1
PLXNB2	Signature_1	Rest	0 of 18	6 of 78	1	0	Inf	1
PRKDC	Signature_3	Rest	0 of 22	6 of 74	1	0	Inf	1
SETD2	Signature_1	Rest	0 of 18	6 of 78	1	0	Inf	1
STXBP5L	Signature_3	Rest	0 of 22	6 of 74	1	0	Inf	1
USP34	Signature_1	Rest	0 of 18	6 of 78	1	0	Inf	1
ZNF831	Signature_1	Rest	0 of 18	6 of 78	1	0	Inf	1
