# Supplementary material for: Maftools: efficient and comprehensive analysis of somatic variants in cancer
Source: HighWire-hosted journal article supplement (doi:10.1101/gr.239244.118), 2018-10-19
Supplement: Supplemental_Table_S4.xlsx [file Supplemental_Table_S4.xlsx]

## Sheet: Supplemental_Table_S4
Supplemental Table S4: Differentially mutated genes between ESCC and EAC
Hugo_Symbol	ESCC	EAC	P-value	OR (Odds-Ratio)	OR-High	OR-Low	Q-value
ERBB4	1	16	4.53742e-05	0.048603	0.00113842	0.32678	0.03698
IVL	1	14	0.00020758	0.0570391	0.00132487	0.390916	0.0370348
SCN5A	1	14	0.00020758	0.0570391	0.00132487	0.390916	0.0370348
ERBB2	0	11	0.000227207	0	0	0.338616	0.0370348
PEG3	0	11	5 of 22	0	0	0.338616	0.0370348
LAMA1	2	16	0.00027361	0.0981063	0.0106126	0.438046	0.0371653
NFE2L2	15	1	0.000349806	16.1327	2.37806	691.404	0.0407275
SCN9A	0	10	0.000503308	0	0	0.383593	0.0455773
TRPS1	0	10	0.000503308	0	0	0.383593	0.0455773
DOCK3	1	12	0.000910217	0.0682843	0.00156875	0.480288	0.0680467
SYNE1	13	31	0.000918421	0.295015	0.129888	0.638825	0.0680467
SCN3A	1	11	0.00187415	0.0754376	0.00172122	0.539556	0.103788
SDK1	1	11	0.00187415	0.0754376	0.00172122	0.539556	0.103788
HMCN1	9	24	0.00203824	0.282096	0.107827	0.679779	0.103788
LRP1B	9	24	0.00203824	0.282096	0.107827	0.679779	0.103788
PREX2	2	13	0.00217381	0.125594	0.0133831	0.580573	0.103788
NRG3	0	8	0.0024196	0	0	0.515015	0.103788
ODZ3	0	8	0.0024196	0	0	0.515015	0.103788
PCDHA12	0	8	0.0024196	0	0	0.515015	0.103788					`
RYR3	5	18	0.00303985	0.218436	0.0604082	0.648971	0.123874
TP53	87	66	0.00350126	3.34677	1.38143	8.78802	0.129716
LRRK2	4	16	0.00359233	0.199989	0.0466492	0.65566	0.129716
PXDN	1	10	0.00381297	0.0840194	0.00190145	0.61321	0.129716
ABCA12	2	12	0.00422054	0.137804	0.0145281	0.647066	0.129716
USH2A	8	21	0.00475428	0.296299	0.106681	0.748517	0.129716
ADAMTS16	0	7	0.00525231	0	0	0.616422	0.129716
CNTN4	0	7	0.00525231	0	0	0.616422	0.129716
FLG2	0	7	0.00525231	0	0	0.616422	0.129716
KIAA1755	0	7	0.00525231	0	0	0.616422	0.129716
KRT23	0	7	0.00525231	0	0	0.616422	0.129716
LRTM1	0	7	0.00525231	0	0	0.616422	0.129716
NETO1	0	7	0.00525231	0	0	0.616422	0.129716
TRPA1	0	7	0.00525231	0	0	0.616422	0.129716
PTPRD	4	15	0.00649418	0.216166	0.0501019	0.716755	0.155669
LRP6	8	0	0.00696248	Inf	1.6587	Inf	0.157623
PDS5B	8	0	0.00696248	Inf	1.6587	Inf	0.157623
ADAMTS2	1	9	0.00765947	0.094505	0.00211777	0.707142	0.165269
MUC6	2	11	0.00807203	0.152229	0.0159222	0.728186	0.165269
CD1E	0	6	0.0113273	0	0	0.762194	0.165269
CHRNB1	0	6	0.0113273	0	0	0.762194	0.165269
CSF2RB	0	6	0.0113273	0	0	0.762194	0.165269
CUL9	0	6	0.0113273	0	0	0.762194	0.165269
ELMO1	0	6	0.0113273	0	0	0.762194	0.165269
FAM13C	0	6	0.0113273	0	0	0.762194	0.165269
LOXL2	0	6	0.0113273	0	0	0.762194	0.165269
MAGEE2	0	6	0.0113273	0	0	0.762194	0.165269
OR10Z1	0	6	0.0113273	0	0	0.762194	0.165269
PCDHA11	0	6	0.0113273	0	0	0.762194	0.165269
PCDHB8	0	6	0.0113273	0	0	0.762194	0.165269
PRDM15	0	6	0.0113273	0	0	0.762194	0.165269
RBM27	0	6	0.0113273	0	0	0.762194	0.165269
SLC27A6	0	6	0.0113273	0	0	0.762194	0.165269
TRAM1L1	0	6	0.0113273	0	0	0.762194	0.165269
TYRO3	0	6	0.0113273	0	0	0.762194	0.165269
LRP2	4	14	0.0115424	0.234646	0.0539886	0.788266	0.165269
ANKRD30A	3	12	0.0136204	0.208606	0.0364786	0.810985	0.165269
ARID1A	3	12	0.0136204	0.208606	0.0364786	0.810985	0.165269
ASTN1	1	8	0.0151768	0.107607	0.00238224	0.830913	0.165269
CNTLN	1	8	0.0151768	0.107607	0.00238224	0.830913	0.165269
EPB41L3	1	8	0.0151768	0.107607	0.00238224	0.830913	0.165269
EVC2	1	8	0.0151768	0.107607	0.00238224	0.830913	0.165269
GRM1	1	8	0.0151768	0.107607	0.00238224	0.830913	0.165269
IGSF10	1	8	0.0151768	0.107607	0.00238224	0.830913	0.165269
LPHN2	1	8	0.0151768	0.107607	0.00238224	0.830913	0.165269
ODZ1	1	8	0.0151768	0.107607	0.00238224	0.830913	0.165269
PTPRC	1	8	0.0151768	0.107607	0.00238224	0.830913	0.165269
ROBO2	1	8	0.0151768	0.107607	0.00238224	0.830913	0.165269
TXNDC3	1	8	0.0151768	0.107607	0.00238224	0.830913	0.165269
NBEA	5	15	0.0162349	0.272901	0.0740543	0.836665	0.165269
SPTA1	7	18	0.0165704	0.312166	0.104199	0.836859	0.165269
ZNF750	9	1	0.0190808	9.02185	1.20588	402.691	0.165269
CSMD1	8	19	0.0205779	0.336889	0.120089	0.864049	0.165269
MUC16	19	32	0.0206644	0.441519	0.21315	0.895052	0.165269
ADAM32	0	5	0.0242727	0	0	0.988656	0.165269
ANUBL1	0	5	0.0242727	0	0	0.988656	0.165269
AQPEP	0	5	0.0242727	0	0	0.988656	0.165269
ARHGAP31	0	5	0.0242727	0	0	0.988656	0.165269
ASTE1	0	5	0.0242727	0	0	0.988656	0.165269
BTN3A1	0	5	0.0242727	0	0	0.988656	0.165269
CLASP1	0	5	0.0242727	0	0	0.988656	0.165269
COL1A2	0	5	0.0242727	0	0	0.988656	0.165269
CYFIP1	0	5	0.0242727	0	0	0.988656	0.165269
DLEC1	0	5	0.0242727	0	0	0.988656	0.165269
ECEL1	0	5	0.0242727	0	0	0.988656	0.165269
EGFLAM	0	5	0.0242727	0	0	0.988656	0.165269
FAM171A1	0	5	0.0242727	0	0	0.988656	0.165269
FLRT2	0	5	0.0242727	0	0	0.988656	0.165269
FRMD6	0	5	0.0242727	0	0	0.988656	0.165269
GBF1	0	5	0.0242727	0	0	0.988656	0.165269
GUCY2C	0	5	0.0242727	0	0	0.988656	0.165269
INPP4A	0	5	0.0242727	0	0	0.988656	0.165269
KSR2	0	5	0.0242727	0	0	0.988656	0.165269
MAGEE1	0	5	0.0242727	0	0	0.988656	0.165269
MAST1	0	5	0.0242727	0	0	0.988656	0.165269
MATN4	0	5	0.0242727	0	0	0.988656	0.165269
MPDZ	0	5	0.0242727	0	0	0.988656	0.165269
NAP1L3	0	5	0.0242727	0	0	0.988656	0.165269
NKAPL	0	5	0.0242727	0	0	0.988656	0.165269
NOX3	0	5	0.0242727	0	0	0.988656	0.165269
OR4A5	0	5	0.0242727	0	0	0.988656	0.165269
PAK6	0	5	0.0242727	0	0	0.988656	0.165269
PAK7	0	5	0.0242727	0	0	0.988656	0.165269
PCNXL2	0	5	0.0242727	0	0	0.988656	0.165269
PER2	0	5	0.0242727	0	0	0.988656	0.165269
PLIN4	0	5	0.0242727	0	0	0.988656	0.165269
SCNN1G	0	5	0.0242727	0	0	0.988656	0.165269
SFRS18	0	5	0.0242727	0	0	0.988656	0.165269
SLC45A4	0	5	0.0242727	0	0	0.988656	0.165269
SLC5A8	0	5	0.0242727	0	0	0.988656	0.165269
SYT16	0	5	0.0242727	0	0	0.988656	0.165269
TM7SF4	0	5	0.0242727	0	0	0.988656	0.165269
TMPRSS15	0	5	0.0242727	0	0	0.988656	0.165269
TNFAIP3	0	5	0.0242727	0	0	0.988656	0.165269
UBE3B	0	5	0.0242727	0	0	0.988656	0.165269
USP29	0	5	0.0242727	0	0	0.988656	0.165269
ZNF677	0	5	0.0242727	0	0	0.988656	0.165269
ZNF835	0	5	0.0242727	0	0	0.988656	0.165269
APC	3	11	0.024334	0.230426	0.039881	0.913883	0.165269
CUBN	3	11	0.024334	0.230426	0.039881	0.913883	0.165269
PCDH9	3	11	0.024334	0.230426	0.039881	0.913883	0.165269
NOTCH1	14	4	0.0251861	3.60496	1.0735	15.6621	0.166508
CDKN2A	5	14	0.0273747	0.296225	0.0797935	0.920622	0.166508
CNTN5	2	9	0.0280916	0.190613	0.0195067	0.9589	0.166508
AMOT	6	0	0.0293978	Inf	1.12278	Inf	0.166508
OPA1	6	0	0.0293978	Inf	1.12278	Inf	0.166508
PIGN	6	0	0.0293978	Inf	1.12278	Inf	0.166508
RUNX1T1	6	0	0.0293978	Inf	1.12278	Inf	0.166508
ARHGAP28	1	7	0.0296241	0.124445	0.00271293	1.001	0.166508
CHRM2	1	7	0.0296241	0.124445	0.00271293	1.001	0.166508
CNTN3	1	7	0.0296241	0.124445	0.00271293	1.001	0.166508
CYLC1	1	7	0.0296241	0.124445	0.00271293	1.001	0.166508
JARID2	1	7	0.0296241	0.124445	0.00271293	1.001	0.166508
KCNH1	1	7	0.0296241	0.124445	0.00271293	1.001	0.166508
L3MBTL4	1	7	0.0296241	0.124445	0.00271293	1.001	0.166508
MXRA5	1	7	0.0296241	0.124445	0.00271293	1.001	0.166508
NRG1	1	7	0.0296241	0.124445	0.00271293	1.001	0.166508
NRXN1	1	7	0.0296241	0.124445	0.00271293	1.001	0.166508
NUP153	1	7	0.0296241	0.124445	0.00271293	1.001	0.166508
OR4C16	1	7	0.0296241	0.124445	0.00271293	1.001	0.166508
PCNXL3	1	7	0.0296241	0.124445	0.00271293	1.001	0.166508
RANBP17	1	7	0.0296241	0.124445	0.00271293	1.001	0.166508
ROBO1	1	7	0.0296241	0.124445	0.00271293	1.001	0.166508
SLITRK1	1	7	0.0296241	0.124445	0.00271293	1.001	0.166508
UBR1	1	7	0.0296241	0.124445	0.00271293	1.001	0.166508
WBSCR17	1	7	0.0296241	0.124445	0.00271293	1.001	0.166508
ANK3	4	12	0.0345038	0.280818	0.0634384	0.974859	0.191297
ZNF208	4	12	0.0345038	0.280818	0.0634384	0.974859	0.191297
EYS	6	15	0.0350621	0.33082	0.0999888	0.957989	0.191783
UNC13C	6	15	0.0350621	0.33082	0.0999888	0.957989	0.191783
XIRP2	9	18	0.0398193	0.410014	0.152344	1.03102	0.216351
CACNA1E	3	10	0.0426322	0.256596	0.0438693	1.04247	0.228587
SMAD4	3	10	0.0426322	0.256596	0.0438693	1.04247	0.228587
DYNC2H1	7	16	0.0430244	0.360807	0.118835	0.987679	0.229182
RYR2	11	20	0.0507002	0.448419	0.180875	1.05999	0.245797
ASTN2	2	8	0.050957	0.217025	0.0218574	1.13035	0.245797
CHD9	2	8	0.050957	0.217025	0.0218574	1.13035	0.245797
DLG2	2	8	0.050957	0.217025	0.0218574	1.13035	0.245797
FOXG1	2	8	0.050957	0.217025	0.0218574	1.13035	0.245797
GOLGB1	2	8	0.050957	0.217025	0.0218574	1.13035	0.245797
GRIA4	2	8	0.050957	0.217025	0.0218574	1.13035	0.245797
LPA	2	8	0.050957	0.217025	0.0218574	1.13035	0.245797
PCDH17	2	8	0.050957	0.217025	0.0218574	1.13035	0.245797
SIPA1L1	2	8	0.050957	0.217025	0.0218574	1.13035	0.245797
TRPM3	2	8	0.050957	0.217025	0.0218574	1.13035	0.245797
TSHZ3	2	8	0.050957	0.217025	0.0218574	1.13035	0.245797
ADAM7	1	6	0.0568628	0.146884	0.00313829	1.24845	0.245797
ANK1	1	6	0.0568628	0.146884	0.00313829	1.24845	0.245797
CACNA1F	1	6	0.0568628	0.146884	0.00313829	1.24845	0.245797
CLSTN2	1	6	0.0568628	0.146884	0.00313829	1.24845	0.245797
COL4A5	1	6	0.0568628	0.146884	0.00313829	1.24845	0.245797
EMR1	1	6	0.0568628	0.146884	0.00313829	1.24845	0.245797
EPHA7	1	6	0.0568628	0.146884	0.00313829	1.24845	0.245797
EPPK1	1	6	0.0568628	0.146884	0.00313829	1.24845	0.245797
GPATCH8	1	6	0.0568628	0.146884	0.00313829	1.24845	0.245797
GRID1	1	6	0.0568628	0.146884	0.00313829	1.24845	0.245797
LRRTM4	1	6	0.0568628	0.146884	0.00313829	1.24845	0.245797
NCOA1	1	6	0.0568628	0.146884	0.00313829	1.24845	0.245797
PCDHA8	1	6	0.0568628	0.146884	0.00313829	1.24845	0.245797
PKD1	1	6	0.0568628	0.146884	0.00313829	1.24845	0.245797
POLE	1	6	0.0568628	0.146884	0.00313829	1.24845	0.245797
POSTN	1	6	0.0568628	0.146884	0.00313829	1.24845	0.245797
RGPD3	1	6	0.0568628	0.146884	0.00313829	1.24845	0.245797
SLC8A1	1	6	0.0568628	0.146884	0.00313829	1.24845	0.245797
SNAP91	1	6	0.0568628	0.146884	0.00313829	1.24845	0.245797
SNTG1	1	6	0.0568628	0.146884	0.00313829	1.24845	0.245797
SULF1	1	6	0.0568628	0.146884	0.00313829	1.24845	0.245797
TTK	1	6	0.0568628	0.146884	0.00313829	1.24845	0.245797
ANK2	4	11	0.0578793	0.310179	0.0692647	1.09969	0.245797
RIMS1	4	11	0.0578793	0.310179	0.0692647	1.09969	0.245797
C10orf140	5	0	0.0600167	Inf	0.866408	Inf	0.245797
CARS	5	0	0.0600167	Inf	0.866408	Inf	0.245797
INTS7	5	0	0.0600167	Inf	0.866408	Inf	0.245797
MAGEB6	5	0	0.0600167	Inf	0.866408	Inf	0.245797
NPHP3	5	0	0.0600167	Inf	0.866408	Inf	0.245797
SGK269	5	0	0.0600167	Inf	0.866408	Inf	0.245797
SYNRG	5	0	0.0600167	Inf	0.866408	Inf	0.245797
ZNF540	5	0	0.0600167	Inf	0.866408	Inf	0.245797
ZNF608	5	0	0.0600167	Inf	0.866408	Inf	0.245797
ZNF644	5	0	0.0600167	Inf	0.866408	Inf	0.245797
CDH10	7	1	0.0659672	6.86451	0.853462	314.942	0.268816
ASXL3	3	9	0.0731113	0.288564	0.0486092	1.20754	0.289251
FBN2	3	9	0.0731113	0.288564	0.0486092	1.20754	0.289251
KCNT2	3	9	0.0731113	0.288564	0.0486092	1.20754	0.289251
MLL5	3	9	0.0731113	0.288564	0.0486092	1.20754	0.289251
PLCL1	3	9	0.0731113	0.288564	0.0486092	1.20754	0.289251
SLITRK5	3	9	0.0731113	0.288564	0.0486092	1.20754	0.289251
TTN	43	52	0.0775719	0.579014	0.309104	1.07647	0.305416
VPS13C	10	3	0.0839343	3.31361	0.81576	19.3771	0.307262
ANKRD50	2	7	0.090469	0.250957	0.024774	1.36714	0.307262
ATP10B	2	7	0.090469	0.250957	0.024774	1.36714	0.307262
BNC1	2	7	0.090469	0.250957	0.024774	1.36714	0.307262
CTNNB1	2	7	0.090469	0.250957	0.024774	1.36714	0.307262
DMXL2	2	7	0.090469	0.250957	0.024774	1.36714	0.307262
GRIA1	2	7	0.090469	0.250957	0.024774	1.36714	0.307262
GRIK4	2	7	0.090469	0.250957	0.024774	1.36714	0.307262
IGFN1	2	7	0.090469	0.250957	0.024774	1.36714	0.307262
KCNJ12	2	7	0.090469	0.250957	0.024774	1.36714	0.307262
KIAA0802	2	7	0.090469	0.250957	0.024774	1.36714	0.307262
KIAA2022	2	7	0.090469	0.250957	0.024774	1.36714	0.307262
LPHN3	2	7	0.090469	0.250957	0.024774	1.36714	0.307262
PROX1	2	7	0.090469	0.250957	0.024774	1.36714	0.307262
PTCHD2	2	7	0.090469	0.250957	0.024774	1.36714	0.307262
RASGRF1	2	7	0.090469	0.250957	0.024774	1.36714	0.307262
XDH	2	7	0.090469	0.250957	0.024774	1.36714	0.307262
VCAN	4	10	0.0949486	0.345392	0.0760765	1.25596	0.307262
ACTL9	1	5	0.107071	0.178277	0.00370574	1.63866	0.307262
AGBL1	1	5	0.107071	0.178277	0.00370574	1.63866	0.307262
AKNA	1	5	0.107071	0.178277	0.00370574	1.63866	0.307262
ARID4B	1	5	0.107071	0.178277	0.00370574	1.63866	0.307262
CACNA2D4	1	5	0.107071	0.178277	0.00370574	1.63866	0.307262
CCDC73	1	5	0.107071	0.178277	0.00370574	1.63866	0.307262
CRMP1	1	5	0.107071	0.178277	0.00370574	1.63866	0.307262
CWF19L2	1	5	0.107071	0.178277	0.00370574	1.63866	0.307262
DAAM2	1	5	0.107071	0.178277	0.00370574	1.63866	0.307262
DCLRE1A	1	5	0.107071	0.178277	0.00370574	1.63866	0.307262
DCN	1	5	0.107071	0.178277	0.00370574	1.63866	0.307262
DNER	1	5	0.107071	0.178277	0.00370574	1.63866	0.307262
EPHA6	1	5	0.107071	0.178277	0.00370574	1.63866	0.307262
FAM47A	1	5	0.107071	0.178277	0.00370574	1.63866	0.307262
GRM4	1	5	0.107071	0.178277	0.00370574	1.63866	0.307262
GSDMC	1	5	0.107071	0.178277	0.00370574	1.63866	0.307262
HECW1	1	5	0.107071	0.178277	0.00370574	1.63866	0.307262
IMPG2	1	5	0.107071	0.178277	0.00370574	1.63866	0.307262
INHBA	1	5	0.107071	0.178277	0.00370574	1.63866	0.307262
INTS8	1	5	0.107071	0.178277	0.00370574	1.63866	0.307262
ITPKB	1	5	0.107071	0.178277	0.00370574	1.63866	0.307262
ITPR1	1	5	0.107071	0.178277	0.00370574	1.63866	0.307262
JAK3	1	5	0.107071	0.178277	0.00370574	1.63866	0.307262
KAT2B	1	5	0.107071	0.178277	0.00370574	1.63866	0.307262
KCNH8	1	5	0.107071	0.178277	0.00370574	1.63866	0.307262
LMO7	1	5	0.107071	0.178277	0.00370574	1.63866	0.307262
MAML2	1	5	0.107071	0.178277	0.00370574	1.63866	0.307262
MAN2B2	1	5	0.107071	0.178277	0.00370574	1.63866	0.307262
MED12	1	5	0.107071	0.178277	0.00370574	1.63866	0.307262
MKL2	1	5	0.107071	0.178277	0.00370574	1.63866	0.307262
MYBPC3	1	5	0.107071	0.178277	0.00370574	1.63866	0.307262
NFASC	1	5	0.107071	0.178277	0.00370574	1.63866	0.307262
NFXL1	1	5	0.107071	0.178277	0.00370574	1.63866	0.307262
NOTCH4	1	5	0.107071	0.178277	0.00370574	1.63866	0.307262
NPBWR1	1	5	0.107071	0.178277	0.00370574	1.63866	0.307262
OR13C2	1	5	0.107071	0.178277	0.00370574	1.63866	0.307262
OR4A16	1	5	0.107071	0.178277	0.00370574	1.63866	0.307262
OR5I1	1	5	0.107071	0.178277	0.00370574	1.63866	0.307262
PDE10A	1	5	0.107071	0.178277	0.00370574	1.63866	0.307262
PGBD1	1	5	0.107071	0.178277	0.00370574	1.63866	0.307262
PHLPP1	1	5	0.107071	0.178277	0.00370574	1.63866	0.307262
PKHD1	1	5	0.107071	0.178277	0.00370574	1.63866	0.307262
PLXNA1	1	5	0.107071	0.178277	0.00370574	1.63866	0.307262
PTPRJ	1	5	0.107071	0.178277	0.00370574	1.63866	0.307262
PTPRS	1	5	0.107071	0.178277	0.00370574	1.63866	0.307262
RET	1	5	0.107071	0.178277	0.00370574	1.63866	0.307262
RXFP2	1	5	0.107071	0.178277	0.00370574	1.63866	0.307262
STARD13	1	5	0.107071	0.178277	0.00370574	1.63866	0.307262
TBX5	1	5	0.107071	0.178277	0.00370574	1.63866	0.307262
TOPBP1	1	5	0.107071	0.178277	0.00370574	1.63866	0.307262
TRIML2	1	5	0.107071	0.178277	0.00370574	1.63866	0.307262
TTBK1	1	5	0.107071	0.178277	0.00370574	1.63866	0.307262
WWP1	1	5	0.107071	0.178277	0.00370574	1.63866	0.307262
ZBTB7B	1	5	0.107071	0.178277	0.00370574	1.63866	0.307262
ZNF425	1	5	0.107071	0.178277	0.00370574	1.63866	0.307262
ZNF43	1	5	0.107071	0.178277	0.00370574	1.63866	0.307262
ZNF681	1	5	0.107071	0.178277	0.00370574	1.63866	0.307262
ZNF828	1	5	0.107071	0.178277	0.00370574	1.63866	0.307262
ZNF98	1	5	0.107071	0.178277	0.00370574	1.63866	0.307262
DNAH11	5	11	0.115915	0.39155	0.102068	1.28716	0.331475
MLL2	21	11	0.119055	1.97824	0.84376	4.87462	0.33158
CPAMD8	6	1	0.119756	5.8213	0.684934	272.504	0.33158
FAM135A	6	1	0.119756	5.8213	0.684934	272.504	0.33158
SETD2	6	1	0.119756	5.8213	0.684934	272.504	0.33158
SPEN	6	1	0.119756	5.8213	0.684934	272.504	0.33158
STXBP5L	6	1	0.119756	5.8213	0.684934	272.504	0.33158
TNN	6	1	0.119756	5.8213	0.684934	272.504	0.33158
USP34	6	1	0.119756	5.8213	0.684934	272.504	0.33158
CAD	3	8	0.122461	0.328496	0.054336	1.42666	0.33158
FCGBP	3	8	0.122461	0.328496	0.054336	1.42666	0.33158
PCDHB3	3	8	0.122461	0.328496	0.054336	1.42666	0.33158
PLXNA4	3	8	0.122461	0.328496	0.054336	1.42666	0.33158
SORCS3	3	8	0.122461	0.328496	0.054336	1.42666	0.33158
STAB2	3	8	0.122461	0.328496	0.054336	1.42666	0.33158
TLN2	3	8	0.122461	0.328496	0.054336	1.42666	0.33158
ZNF804A	3	8	0.122461	0.328496	0.054336	1.42666	0.33158
FAT4	9	16	0.130758	0.47389	0.173611	1.21804	0.352874
HUWE1	6	12	0.135765	0.429712	0.126102	1.30748	0.361806
MUC5B	6	12	0.135765	0.429712	0.126102	1.30748	0.361806
RIMS2	6	12	0.135765	0.429712	0.126102	1.30748	0.361806
NOTCH3	9	3	0.136288	2.94948	0.704926	17.506	0.361806
PTCH1	9	3	0.136288	2.94948	0.704926	17.506	0.361806
PIK3CA	13	6	0.150708	2.15795	0.723055	7.26826	0.361902
FBXW7	4	9	0.152015	0.388403	0.0841289	1.45693	0.361902
HCN1	4	9	0.152015	0.388403	0.0841289	1.45693	0.361902
HEATR7B2	4	9	0.152015	0.388403	0.0841289	1.45693	0.361902
HSPG2	4	9	0.152015	0.388403	0.0841289	1.45693	0.361902
KIAA2018	4	9	0.152015	0.388403	0.0841289	1.45693	0.361902
SETBP1	4	9	0.152015	0.388403	0.0841289	1.45693	0.361902
WDR17	4	9	0.152015	0.388403	0.0841289	1.45693	0.361902
ZNF521	4	9	0.152015	0.388403	0.0841289	1.45693	0.361902
ZNF536	4	9	0.152015	0.388403	0.0841289	1.45693	0.361902
ABCA6	2	6	0.15675	0.296144	0.0284917	1.71399	0.361902
ACTN2	2	6	0.15675	0.296144	0.0284917	1.71399	0.361902
BAZ2B	2	6	0.15675	0.296144	0.0284917	1.71399	0.361902
CABIN1	2	6	0.15675	0.296144	0.0284917	1.71399	0.361902
CDK13	2	6	0.15675	0.296144	0.0284917	1.71399	0.361902
CELSR1	2	6	0.15675	0.296144	0.0284917	1.71399	0.361902
CHD5	2	6	0.15675	0.296144	0.0284917	1.71399	0.361902
CHL1	2	6	0.15675	0.296144	0.0284917	1.71399	0.361902
COL5A1	2	6	0.15675	0.296144	0.0284917	1.71399	0.361902
COL6A1	2	6	0.15675	0.296144	0.0284917	1.71399	0.361902
CPXM2	2	6	0.15675	0.296144	0.0284917	1.71399	0.361902
CYFIP2	2	6	0.15675	0.296144	0.0284917	1.71399	0.361902
DDX60	2	6	0.15675	0.296144	0.0284917	1.71399	0.361902
EP400	2	6	0.15675	0.296144	0.0284917	1.71399	0.361902
EPHA5	2	6	0.15675	0.296144	0.0284917	1.71399	0.361902
ETAA1	2	6	0.15675	0.296144	0.0284917	1.71399	0.361902
F8	2	6	0.15675	0.296144	0.0284917	1.71399	0.361902
FRAS1	2	6	0.15675	0.296144	0.0284917	1.71399	0.361902
FREM1	2	6	0.15675	0.296144	0.0284917	1.71399	0.361902
LAMB4	2	6	0.15675	0.296144	0.0284917	1.71399	0.361902
LIMA1	2	6	0.15675	0.296144	0.0284917	1.71399	0.361902
LPIN3	2	6	0.15675	0.296144	0.0284917	1.71399	0.361902
LRP1	2	6	0.15675	0.296144	0.0284917	1.71399	0.361902
LRP4	2	6	0.15675	0.296144	0.0284917	1.71399	0.361902
MYO3A	2	6	0.15675	0.296144	0.0284917	1.71399	0.361902
NELL1	2	6	0.15675	0.296144	0.0284917	1.71399	0.361902
OCA2	2	6	0.15675	0.296144	0.0284917	1.71399	0.361902
OTOF	2	6	0.15675	0.296144	0.0284917	1.71399	0.361902
PDCD11	2	6	0.15675	0.296144	0.0284917	1.71399	0.361902
PPP1R3A	2	6	0.15675	0.296144	0.0284917	1.71399	0.361902
RFX6	2	6	0.15675	0.296144	0.0284917	1.71399	0.361902
RGS12	2	6	0.15675	0.296144	0.0284917	1.71399	0.361902
SCN10A	2	6	0.15675	0.296144	0.0284917	1.71399	0.361902
SLITRK3	2	6	0.15675	0.296144	0.0284917	1.71399	0.361902
SPTAN1	2	6	0.15675	0.296144	0.0284917	1.71399	0.361902
TRIOBP	2	6	0.15675	0.296144	0.0284917	1.71399	0.361902
CEP290	7	2	0.171779	3.40124	0.624313	34.4488	0.395479
FLG	13	19	0.177614	0.578779	0.24387	1.33597	0.407762
TG	5	10	0.179001	0.435988	0.112011	1.47156	0.409791
CACNA1H	3	7	0.199796	0.379797	0.0613915	1.73051	0.431919
CDH9	3	7	0.199796	0.379797	0.0613915	1.73051	0.431919
CHD3	3	7	0.199796	0.379797	0.0613915	1.73051	0.431919
CPS1	3	7	0.199796	0.379797	0.0613915	1.73051	0.431919
DNHD1	3	7	0.199796	0.379797	0.0613915	1.73051	0.431919
FAM5C	3	7	0.199796	0.379797	0.0613915	1.73051	0.431919
FANCM	3	7	0.199796	0.379797	0.0613915	1.73051	0.431919
FNDC1	3	7	0.199796	0.379797	0.0613915	1.73051	0.431919
HIVEP2	3	7	0.199796	0.379797	0.0613915	1.73051	0.431919
MICAL2	3	7	0.199796	0.379797	0.0613915	1.73051	0.431919
NID1	3	7	0.199796	0.379797	0.0613915	1.73051	0.431919
NLGN1	3	7	0.199796	0.379797	0.0613915	1.73051	0.431919
NUP210	3	7	0.199796	0.379797	0.0613915	1.73051	0.431919
PLCE1	3	7	0.199796	0.379797	0.0613915	1.73051	0.431919
SLIT3	3	7	0.199796	0.379797	0.0613915	1.73051	0.431919
SNTG2	3	7	0.199796	0.379797	0.0613915	1.73051	0.431919
TNR	3	7	0.199796	0.379797	0.0613915	1.73051	0.431919
TPTE	3	7	0.199796	0.379797	0.0613915	1.73051	0.431919
TSC1	3	7	0.199796	0.379797	0.0613915	1.73051	0.431919
UNC5D	3	7	0.199796	0.379797	0.0613915	1.73051	0.431919
ZC3H13	3	7	0.199796	0.379797	0.0613915	1.73051	0.431919
ABCA13	6	11	0.203549	0.474618	0.137456	1.47715	0.43314
DCHS2	6	11	0.203549	0.474618	0.137456	1.47715	0.43314
DNAH7	6	11	0.203549	0.474618	0.137456	1.47715	0.43314
DNAH9	6	11	0.203549	0.474618	0.137456	1.47715	0.43314
MYO18B	6	11	0.203549	0.474618	0.137456	1.47715	0.43314
NAV3	6	11	0.203549	0.474618	0.137456	1.47715	0.43314
ATP13A1	5	1	0.213111	4.80066	0.522283	230.981	0.434214
CYTSA	5	1	0.213111	4.80066	0.522283	230.981	0.434214
ERN2	5	1	0.213111	4.80066	0.522283	230.981	0.434214
FBXO15	5	1	0.213111	4.80066	0.522283	230.981	0.434214
GCC2	5	1	0.213111	4.80066	0.522283	230.981	0.434214
HIPK2	5	1	0.213111	4.80066	0.522283	230.981	0.434214
KIF7	5	1	0.213111	4.80066	0.522283	230.981	0.434214
KPNB1	5	1	0.213111	4.80066	0.522283	230.981	0.434214
MYLK	5	1	0.213111	4.80066	0.522283	230.981	0.434214
R3HDM2	5	1	0.213111	4.80066	0.522283	230.981	0.434214
RFX7	5	1	0.213111	4.80066	0.522283	230.981	0.434214
RICTOR	5	1	0.213111	4.80066	0.522283	230.981	0.434214
SEMA3A	5	1	0.213111	4.80066	0.522283	230.981	0.434214
SGK223	5	1	0.213111	4.80066	0.522283	230.981	0.434214
TJP1	5	1	0.213111	4.80066	0.522283	230.981	0.434214
USP6NL	5	1	0.213111	4.80066	0.522283	230.981	0.434214
ZFC3H1	5	1	0.213111	4.80066	0.522283	230.981	0.434214
AHNAK	8	3	0.216148	2.59353	0.597208	15.6779	0.438212
HDAC4	8	3	0.216148	2.59353	0.597208	15.6779	0.438212
COL6A5	12	6	0.220531	1.96912	0.647289	6.70853	0.445528
DMD	7	12	0.225877	0.506531	0.160468	1.47758	0.445528
DNAH10	7	12	0.225877	0.506531	0.160468	1.47758	0.445528
ZFHX4	7	12	0.225877	0.506531	0.160468	1.47758	0.445528
PCLO	12	17	0.231743	0.606701	0.246503	1.45087	0.445528
ADAMTS19	4	8	0.236954	0.442128	0.093864	1.72437	0.445528
SALL1	4	8	0.236954	0.442128	0.093864	1.72437	0.445528
SCN7A	4	8	0.236954	0.442128	0.093864	1.72437	0.445528
TRHDE	4	8	0.236954	0.442128	0.093864	1.72437	0.445528
PCDH15	8	13	0.246217	0.533288	0.181249	1.4748	0.445528
MAP1B	9	4	0.254083	2.18935	0.583733	10.1046	0.445528
PAPPA2	9	4	0.254083	2.18935	0.583733	10.1046	0.445528
ABCB1	2	5	0.264037	0.359342	0.0333837	2.26547	0.445528
ABCC5	2	5	0.264037	0.359342	0.0333837	2.26547	0.445528
ADAM22	2	5	0.264037	0.359342	0.0333837	2.26547	0.445528
AEBP1	2	5	0.264037	0.359342	0.0333837	2.26547	0.445528
AKAP2	2	5	0.264037	0.359342	0.0333837	2.26547	0.445528
ATP10A	2	5	0.264037	0.359342	0.0333837	2.26547	0.445528
ATP8B3	2	5	0.264037	0.359342	0.0333837	2.26547	0.445528
BCHE	2	5	0.264037	0.359342	0.0333837	2.26547	0.445528
BTAF1	2	5	0.264037	0.359342	0.0333837	2.26547	0.445528
BZRAP1	2	5	0.264037	0.359342	0.0333837	2.26547	0.445528
C10orf90	2	5	0.264037	0.359342	0.0333837	2.26547	0.445528
C6orf167	2	5	0.264037	0.359342	0.0333837	2.26547	0.445528
CACNA1D	2	5	0.264037	0.359342	0.0333837	2.26547	0.445528
CDH18	2	5	0.264037	0.359342	0.0333837	2.26547	0.445528
CIC	2	5	0.264037	0.359342	0.0333837	2.26547	0.445528
CNNM2	2	5	0.264037	0.359342	0.0333837	2.26547	0.445528
CNTNAP2	2	5	0.264037	0.359342	0.0333837	2.26547	0.445528
CNTNAP4	2	5	0.264037	0.359342	0.0333837	2.26547	0.445528
COL21A1	2	5	0.264037	0.359342	0.0333837	2.26547	0.445528
COL3A1	2	5	0.264037	0.359342	0.0333837	2.26547	0.445528
CORO7	2	5	0.264037	0.359342	0.0333837	2.26547	0.445528
CPNE8	2	5	0.264037	0.359342	0.0333837	2.26547	0.445528
CTNNA1	2	5	0.264037	0.359342	0.0333837	2.26547	0.445528
DHX9	2	5	0.264037	0.359342	0.0333837	2.26547	0.445528
DNAH12	2	5	0.264037	0.359342	0.0333837	2.26547	0.445528
DOCK4	2	5	0.264037	0.359342	0.0333837	2.26547	0.445528
DOPEY1	2	5	0.264037	0.359342	0.0333837	2.26547	0.445528
DOPEY2	2	5	0.264037	0.359342	0.0333837	2.26547	0.445528
DSCAM	2	5	0.264037	0.359342	0.0333837	2.26547	0.445528
FAM160A2	2	5	0.264037	0.359342	0.0333837	2.26547	0.445528
FAM47C	2	5	0.264037	0.359342	0.0333837	2.26547	0.445528
FAM75A6	2	5	0.264037	0.359342	0.0333837	2.26547	0.445528
FARP1	2	5	0.264037	0.359342	0.0333837	2.26547	0.445528
FILIP1	2	5	0.264037	0.359342	0.0333837	2.26547	0.445528
FN1	2	5	0.264037	0.359342	0.0333837	2.26547	0.445528
FRMD4A	2	5	0.264037	0.359342	0.0333837	2.26547	0.445528
GABRA1	2	5	0.264037	0.359342	0.0333837	2.26547	0.445528
INO80D	2	5	0.264037	0.359342	0.0333837	2.26547	0.445528
KCNU1	2	5	0.264037	0.359342	0.0333837	2.26547	0.445528
KIAA1244	2	5	0.264037	0.359342	0.0333837	2.26547	0.445528
MSH6	2	5	0.264037	0.359342	0.0333837	2.26547	0.445528
MYOM1	2	5	0.264037	0.359342	0.0333837	2.26547	0.445528
NBAS	2	5	0.264037	0.359342	0.0333837	2.26547	0.445528
NOX4	2	5	0.264037	0.359342	0.0333837	2.26547	0.445528
NRXN2	2	5	0.264037	0.359342	0.0333837	2.26547	0.445528
OBSL1	2	5	0.264037	0.359342	0.0333837	2.26547	0.445528
PCDHA13	2	5	0.264037	0.359342	0.0333837	2.26547	0.445528
PRKD1	2	5	0.264037	0.359342	0.0333837	2.26547	0.445528
RAPGEF4	2	5	0.264037	0.359342	0.0333837	2.26547	0.445528
RASA1	2	5	0.264037	0.359342	0.0333837	2.26547	0.445528
RBBP6	2	5	0.264037	0.359342	0.0333837	2.26547	0.445528
RNF17	2	5	0.264037	0.359342	0.0333837	2.26547	0.445528
RSPH10B	2	5	0.264037	0.359342	0.0333837	2.26547	0.445528
SCN11A	2	5	0.264037	0.359342	0.0333837	2.26547	0.445528
SCN8A	2	5	0.264037	0.359342	0.0333837	2.26547	0.445528
SETX	2	5	0.264037	0.359342	0.0333837	2.26547	0.445528
SLC39A12	2	5	0.264037	0.359342	0.0333837	2.26547	0.445528
SLC9A10	2	5	0.264037	0.359342	0.0333837	2.26547	0.445528
SLCO3A1	2	5	0.264037	0.359342	0.0333837	2.26547	0.445528
SORL1	2	5	0.264037	0.359342	0.0333837	2.26547	0.445528
SSH2	2	5	0.264037	0.359342	0.0333837	2.26547	0.445528
TAF1L	2	5	0.264037	0.359342	0.0333837	2.26547	0.445528
THADA	2	5	0.264037	0.359342	0.0333837	2.26547	0.445528
TRIM49	2	5	0.264037	0.359342	0.0333837	2.26547	0.445528
TSC2	2	5	0.264037	0.359342	0.0333837	2.26547	0.445528
TUBA3C	2	5	0.264037	0.359342	0.0333837	2.26547	0.445528
WDR7	2	5	0.264037	0.359342	0.0333837	2.26547	0.445528
ZMYM3	2	5	0.264037	0.359342	0.0333837	2.26547	0.445528
ZNF667	2	5	0.264037	0.359342	0.0333837	2.26547	0.445528
BOD1L	5	9	0.269189	0.490266	0.12376	1.70895	0.447733
CDH11	5	9	0.269189	0.490266	0.12376	1.70895	0.447733
DBC1	5	9	0.269189	0.490266	0.12376	1.70895	0.447733
FBN1	5	9	0.269189	0.490266	0.12376	1.70895	0.447733
MYCBP2	5	9	0.269189	0.490266	0.12376	1.70895	0.447733
SI	5	9	0.269189	0.490266	0.12376	1.70895	0.447733
ZFPM2	5	9	0.269189	0.490266	0.12376	1.70895	0.447733
ACACA	6	2	0.281124	2.88489	0.498442	29.9811	0.463798
CEP152	6	2	0.281124	2.88489	0.498442	29.9811	0.463798
DPP6	6	2	0.281124	2.88489	0.498442	29.9811	0.463798
WDR81	6	2	0.281124	2.88489	0.498442	29.9811	0.463798
FAT3	10	15	0.281796	0.575378	0.217076	1.46426	0.463967
LRRIQ1	6	10	0.297363	0.528487	0.150676	1.69006	0.48861
ADAMTS9	3	6	0.316416	0.448135	0.0703139	2.17732	0.49497
ATP1A2	3	6	0.316416	0.448135	0.0703139	2.17732	0.49497
CAMTA1	3	6	0.316416	0.448135	0.0703139	2.17732	0.49497
CD109	3	6	0.316416	0.448135	0.0703139	2.17732	0.49497
CDH12	3	6	0.316416	0.448135	0.0703139	2.17732	0.49497
DCHS1	3	6	0.316416	0.448135	0.0703139	2.17732	0.49497
DEPDC5	3	6	0.316416	0.448135	0.0703139	2.17732	0.49497
DLC1	3	6	0.316416	0.448135	0.0703139	2.17732	0.49497
DSCAML1	3	6	0.316416	0.448135	0.0703139	2.17732	0.49497
DYNC1H1	3	6	0.316416	0.448135	0.0703139	2.17732	0.49497
FAM38B	3	6	0.316416	0.448135	0.0703139	2.17732	0.49497
FOLH1	3	6	0.316416	0.448135	0.0703139	2.17732	0.49497
GREB1	3	6	0.316416	0.448135	0.0703139	2.17732	0.49497
INSR	3	6	0.316416	0.448135	0.0703139	2.17732	0.49497
JAKMIP3	3	6	0.316416	0.448135	0.0703139	2.17732	0.49497
KCNQ3	3	6	0.316416	0.448135	0.0703139	2.17732	0.49497
LRP12	3	6	0.316416	0.448135	0.0703139	2.17732	0.49497
LZTR1	3	6	0.316416	0.448135	0.0703139	2.17732	0.49497
MYST3	3	6	0.316416	0.448135	0.0703139	2.17732	0.49497
PCDH20	3	6	0.316416	0.448135	0.0703139	2.17732	0.49497
SEMA5A	3	6	0.316416	0.448135	0.0703139	2.17732	0.49497
SEMA6D	3	6	0.316416	0.448135	0.0703139	2.17732	0.49497
SIGLEC1	3	6	0.316416	0.448135	0.0703139	2.17732	0.49497
SLCO1B3	3	6	0.316416	0.448135	0.0703139	2.17732	0.49497
SLIT2	3	6	0.316416	0.448135	0.0703139	2.17732	0.49497
ASXL1	7	3	0.333772	2.2453	0.492849	13.8888	0.51913
PLXND1	7	3	0.333772	2.2453	0.492849	13.8888	0.51913
PRDM9	7	3	0.333772	2.2453	0.492849	13.8888	0.51913
ADAMTS12	4	7	0.358554	0.511157	0.105814	2.09601	0.547231
COL6A6	4	7	0.358554	0.511157	0.105814	2.09601	0.547231
KCNMA1	4	7	0.358554	0.511157	0.105814	2.09601	0.547231
MAP2	4	7	0.358554	0.511157	0.105814	2.09601	0.547231
MDGA2	4	7	0.358554	0.511157	0.105814	2.09601	0.547231
MMP16	4	7	0.358554	0.511157	0.105814	2.09601	0.547231
MYH1	4	7	0.358554	0.511157	0.105814	2.09601	0.547231
NAV2	4	7	0.358554	0.511157	0.105814	2.09601	0.547231
NCAPD3	4	7	0.358554	0.511157	0.105814	2.09601	0.547231
UBR4	4	7	0.358554	0.511157	0.105814	2.09601	0.547231
KALRN	8	4	0.37587	1.92517	0.493696	9.06622	0.569394
NSD1	8	4	0.37587	1.92517	0.493696	9.06622	0.569394
PLXNA2	8	4	0.37587	1.92517	0.493696	9.06622	0.569394
TCHH	8	4	0.37587	1.92517	0.493696	9.06622	0.569394
HTT	5	8	0.393269	0.558077	0.137857	2.02528	0.590266
MGA	5	8	0.393269	0.558077	0.137857	2.02528	0.590266
NIPBL	5	8	0.393269	0.558077	0.137857	2.02528	0.590266
TECTA	5	8	0.393269	0.558077	0.137857	2.02528	0.590266
TNXB	5	8	0.393269	0.558077	0.137857	2.02528	0.590266
CACNA1C	9	5	0.410423	1.73286	0.497188	6.86344	0.612628
DNAH8	9	5	0.410423	1.73286	0.497188	6.86344	0.612628
SPTBN4	9	5	0.410423	1.73286	0.497188	6.86344	0.612628
DCC	6	9	0.422436	0.594271	0.1663	1.96466	0.625974
FAT2	6	9	0.422436	0.594271	0.1663	1.96466	0.625974
NCKAP5	6	9	0.422436	0.594271	0.1663	1.96466	0.625974
PCDH11X	6	9	0.422436	0.594271	0.1663	1.96466	0.625974
HYDIN	10	6	0.439384	1.60446	0.501756	5.6254	0.630526
ARHGEF18	5	2	0.446498	2.37972	0.377449	25.6102	0.630526
ATF7IP	5	2	0.446498	2.37972	0.377449	25.6102	0.630526
DSG1	5	2	0.446498	2.37972	0.377449	25.6102	0.630526
INF2	5	2	0.446498	2.37972	0.377449	25.6102	0.630526
KDM4C	5	2	0.446498	2.37972	0.377449	25.6102	0.630526
LRPPRC	5	2	0.446498	2.37972	0.377449	25.6102	0.630526
LRRC37A3	5	2	0.446498	2.37972	0.377449	25.6102	0.630526
MED13	5	2	0.446498	2.37972	0.377449	25.6102	0.630526
MYH15	5	2	0.446498	2.37972	0.377449	25.6102	0.630526
MYO7B	5	2	0.446498	2.37972	0.377449	25.6102	0.630526
OSBPL6	5	2	0.446498	2.37972	0.377449	25.6102	0.630526
PARD3	5	2	0.446498	2.37972	0.377449	25.6102	0.630526
PKD2	5	2	0.446498	2.37972	0.377449	25.6102	0.630526
PTEN	5	2	0.446498	2.37972	0.377449	25.6102	0.630526
PTPRU	5	2	0.446498	2.37972	0.377449	25.6102	0.630526
SMG1	5	2	0.446498	2.37972	0.377449	25.6102	0.630526
ST18	5	2	0.446498	2.37972	0.377449	25.6102	0.630526
SYNJ1	5	2	0.446498	2.37972	0.377449	25.6102	0.630526
TNKS2	5	2	0.446498	2.37972	0.377449	25.6102	0.630526
UTRN	5	2	0.446498	2.37972	0.377449	25.6102	0.630526
YEATS2	5	2	0.446498	2.37972	0.377449	25.6102	0.630526
ZEB2	5	2	0.446498	2.37972	0.377449	25.6102	0.630526
DOCK2	7	10	0.447338	0.622953	0.191493	1.91238	0.630526
NEB	7	10	0.447338	0.622953	0.191493	1.91238	0.630526
FMN2	8	11	0.468883	0.646167	0.213846	1.86697	0.630526
ADAMTS20	3	5	0.484306	0.543715	0.0819446	2.89155	0.630526
ADAMTSL1	3	5	0.484306	0.543715	0.0819446	2.89155	0.630526
AFF2	3	5	0.484306	0.543715	0.0819446	2.89155	0.630526
ALK	3	5	0.484306	0.543715	0.0819446	2.89155	0.630526
ARAP2	3	5	0.484306	0.543715	0.0819446	2.89155	0.630526
ARHGAP21	3	5	0.484306	0.543715	0.0819446	2.89155	0.630526
ARHGAP5	3	5	0.484306	0.543715	0.0819446	2.89155	0.630526
ARMC4	3	5	0.484306	0.543715	0.0819446	2.89155	0.630526
BAI2	3	5	0.484306	0.543715	0.0819446	2.89155	0.630526
BRD4	3	5	0.484306	0.543715	0.0819446	2.89155	0.630526
C15orf2	3	5	0.484306	0.543715	0.0819446	2.89155	0.630526
CACNA1I	3	5	0.484306	0.543715	0.0819446	2.89155	0.630526
CNGB3	3	5	0.484306	0.543715	0.0819446	2.89155	0.630526
COL11A2	3	5	0.484306	0.543715	0.0819446	2.89155	0.630526
COL14A1	3	5	0.484306	0.543715	0.0819446	2.89155	0.630526
CRB1	3	5	0.484306	0.543715	0.0819446	2.89155	0.630526
CSF1R	3	5	0.484306	0.543715	0.0819446	2.89155	0.630526
DAPK1	3	5	0.484306	0.543715	0.0819446	2.89155	0.630526
DCLRE1C	3	5	0.484306	0.543715	0.0819446	2.89155	0.630526
ENTHD1	3	5	0.484306	0.543715	0.0819446	2.89155	0.630526
EPHA3	3	5	0.484306	0.543715	0.0819446	2.89155	0.630526
EPHB1	3	5	0.484306	0.543715	0.0819446	2.89155	0.630526
FSTL5	3	5	0.484306	0.543715	0.0819446	2.89155	0.630526
GABRA2	3	5	0.484306	0.543715	0.0819446	2.89155	0.630526
GLI3	3	5	0.484306	0.543715	0.0819446	2.89155	0.630526
HECW2	3	5	0.484306	0.543715	0.0819446	2.89155	0.630526
HRNR	3	5	0.484306	0.543715	0.0819446	2.89155	0.630526
IFT140	3	5	0.484306	0.543715	0.0819446	2.89155	0.630526
JAKMIP2	3	5	0.484306	0.543715	0.0819446	2.89155	0.630526
LCT	3	5	0.484306	0.543715	0.0819446	2.89155	0.630526
MYT1L	3	5	0.484306	0.543715	0.0819446	2.89155	0.630526
NCAPD2	3	5	0.484306	0.543715	0.0819446	2.89155	0.630526
NES	3	5	0.484306	0.543715	0.0819446	2.89155	0.630526
NF1	3	5	0.484306	0.543715	0.0819446	2.89155	0.630526
ODZ2	3	5	0.484306	0.543715	0.0819446	2.89155	0.630526
OR5L2	3	5	0.484306	0.543715	0.0819446	2.89155	0.630526
PBRM1	3	5	0.484306	0.543715	0.0819446	2.89155	0.630526
PCDH18	3	5	0.484306	0.543715	0.0819446	2.89155	0.630526
PKDREJ	3	5	0.484306	0.543715	0.0819446	2.89155	0.630526
PLXNB1	3	5	0.484306	0.543715	0.0819446	2.89155	0.630526
PRUNE2	3	5	0.484306	0.543715	0.0819446	2.89155	0.630526
SMC2	3	5	0.484306	0.543715	0.0819446	2.89155	0.630526
SRCAP	3	5	0.484306	0.543715	0.0819446	2.89155	0.630526
STAB1	3	5	0.484306	0.543715	0.0819446	2.89155	0.630526
TEX14	3	5	0.484306	0.543715	0.0819446	2.89155	0.630526
TMEM132D	3	5	0.484306	0.543715	0.0819446	2.89155	0.630526
TOP2B	3	5	0.484306	0.543715	0.0819446	2.89155	0.630526
TRPM1	3	5	0.484306	0.543715	0.0819446	2.89155	0.630526
UNC5C	3	5	0.484306	0.543715	0.0819446	2.89155	0.630526
VAV1	3	5	0.484306	0.543715	0.0819446	2.89155	0.630526
SYNE2	12	8	0.48541	1.44357	0.511662	4.29852	0.630956
ACACB	6	3	0.499815	1.90466	0.392006	12.1384	0.639481
CNTN6	6	3	0.499815	1.90466	0.392006	12.1384	0.639481
FRY	6	3	0.499815	1.90466	0.392006	12.1384	0.639481
KIF20B	6	3	0.499815	1.90466	0.392006	12.1384	0.639481
LRBA	6	3	0.499815	1.90466	0.392006	12.1384	0.639481
MGAM	6	3	0.499815	1.90466	0.392006	12.1384	0.639481
PCDHA7	6	3	0.499815	1.90466	0.392006	12.1384	0.639481
RTN1	6	3	0.499815	1.90466	0.392006	12.1384	0.639481
SCN1A	6	3	0.499815	1.90466	0.392006	12.1384	0.639481
SORCS1	6	3	0.499815	1.90466	0.392006	12.1384	0.639481
ABCC9	4	6	0.524842	0.6031	0.12084	2.6445	0.658071
ADCY8	4	6	0.524842	0.6031	0.12084	2.6445	0.658071
CFH	4	6	0.524842	0.6031	0.12084	2.6445	0.658071
FBN3	4	6	0.524842	0.6031	0.12084	2.6445	0.658071
ITGA8	4	6	0.524842	0.6031	0.12084	2.6445	0.658071
LRRC7	4	6	0.524842	0.6031	0.12084	2.6445	0.658071
MTOR	4	6	0.524842	0.6031	0.12084	2.6445	0.658071
NIN	4	6	0.524842	0.6031	0.12084	2.6445	0.658071
REV3L	4	6	0.524842	0.6031	0.12084	2.6445	0.658071
RIMBP2	4	6	0.524842	0.6031	0.12084	2.6445	0.658071
THSD7B	4	6	0.524842	0.6031	0.12084	2.6445	0.658071
UNC13A	4	6	0.524842	0.6031	0.12084	2.6445	0.658071
USP24	4	6	0.524842	0.6031	0.12084	2.6445	0.658071
DST	12	14	0.534947	0.766421	0.302919	1.91138	0.669711
KIF26B	7	4	0.539613	1.66681	0.4065	8.0509	0.673484
ZNF292	7	4	0.539613	1.66681	0.4065	8.0509	0.673484
AKAP13	5	7	0.556577	0.645179	0.155106	2.46618	0.686249
ATP10D	5	7	0.556577	0.645179	0.155106	2.46618	0.686249
COL12A1	5	7	0.556577	0.645179	0.155106	2.46618	0.686249
COL6A3	5	7	0.556577	0.645179	0.155106	2.46618	0.686249
MYH7	5	7	0.556577	0.645179	0.155106	2.46618	0.686249
MYO15A	5	7	0.556577	0.645179	0.155106	2.46618	0.686249
PCNT	5	7	0.556577	0.645179	0.155106	2.46618	0.686249
SAMD9L	5	7	0.556577	0.645179	0.155106	2.46618	0.686249
ATRNL1	8	5	0.570729	1.52383	0.419876	6.16788	0.701575
SMARCA4	8	5	0.570729	1.52383	0.419876	6.16788	0.701575
CSMD2	6	8	0.582249	0.67644	0.18503	2.33124	0.712511
HERC1	6	8	0.582249	0.67644	0.18503	2.33124	0.712511
PDZD2	6	8	0.582249	0.67644	0.18503	2.33124	0.712511
MLL	9	6	0.595882	1.42829	0.432037	5.1029	0.725924
RNF213	9	6	0.595882	1.42829	0.432037	5.1029	0.725924
TGFBR2	9	6	0.595882	1.42829	0.432037	5.1029	0.725924
BAI3	7	9	0.603534	0.700486	0.21116	2.22477	0.734149
ODZ4	8	10	0.621526	0.719475	0.234113	2.13885	0.754908
MACF1	12	9	0.64949	1.26821	0.46174	3.60815	0.786529
ZNF804B	12	9	0.64949	1.26821	0.46174	3.60815	0.786529
DNAH5	17	18	0.709608	0.84956	0.379131	1.8964	0.835429
CSMD3	19	20	0.719712	0.852043	0.393943	1.83702	0.835429
ABCA10	5	3	0.72212	1.5713	0.295458	10.4266	0.835429
AFF3	5	3	0.72212	1.5713	0.295458	10.4266	0.835429
ASPM	5	3	0.72212	1.5713	0.295458	10.4266	0.835429
C5orf42	5	3	0.72212	1.5713	0.295458	10.4266	0.835429
CENPF	5	3	0.72212	1.5713	0.295458	10.4266	0.835429
CFTR	5	3	0.72212	1.5713	0.295458	10.4266	0.835429
ESPL1	5	3	0.72212	1.5713	0.295458	10.4266	0.835429
FAM65B	5	3	0.72212	1.5713	0.295458	10.4266	0.835429
GCN1L1	5	3	0.72212	1.5713	0.295458	10.4266	0.835429
GPR112	5	3	0.72212	1.5713	0.295458	10.4266	0.835429
KIAA1529	5	3	0.72212	1.5713	0.295458	10.4266	0.835429
MED13L	5	3	0.72212	1.5713	0.295458	10.4266	0.835429
MFN2	5	3	0.72212	1.5713	0.295458	10.4266	0.835429
PPL	5	3	0.72212	1.5713	0.295458	10.4266	0.835429
PSMC4	5	3	0.72212	1.5713	0.295458	10.4266	0.835429
SMARCA2	5	3	0.72212	1.5713	0.295458	10.4266	0.835429
TRERF1	5	3	0.72212	1.5713	0.295458	10.4266	0.835429
VCL	5	3	0.72212	1.5713	0.295458	10.4266	0.835429
ZFHX3	5	3	0.72212	1.5713	0.295458	10.4266	0.835429
ZNF496	5	3	0.72212	1.5713	0.295458	10.4266	0.835429
ACSS3	4	5	0.740017	0.73168	0.140323	3.52413	0.835429
ANKRD36	4	5	0.740017	0.73168	0.140323	3.52413	0.835429
ATP8A1	4	5	0.740017	0.73168	0.140323	3.52413	0.835429
BRCA2	4	5	0.740017	0.73168	0.140323	3.52413	0.835429
CHD7	4	5	0.740017	0.73168	0.140323	3.52413	0.835429
CTNND1	4	5	0.740017	0.73168	0.140323	3.52413	0.835429
DNAH1	4	5	0.740017	0.73168	0.140323	3.52413	0.835429
DNAH6	4	5	0.740017	0.73168	0.140323	3.52413	0.835429
DOCK1	4	5	0.740017	0.73168	0.140323	3.52413	0.835429
GRM3	4	5	0.740017	0.73168	0.140323	3.52413	0.835429
HDLBP	4	5	0.740017	0.73168	0.140323	3.52413	0.835429
KIAA0319	4	5	0.740017	0.73168	0.140323	3.52413	0.835429
LRRC32	4	5	0.740017	0.73168	0.140323	3.52413	0.835429
LYST	4	5	0.740017	0.73168	0.140323	3.52413	0.835429
MYO16	4	5	0.740017	0.73168	0.140323	3.52413	0.835429
MYO7A	4	5	0.740017	0.73168	0.140323	3.52413	0.835429
NBEAL2	4	5	0.740017	0.73168	0.140323	3.52413	0.835429
PPFIA2	4	5	0.740017	0.73168	0.140323	3.52413	0.835429
RP1L1	4	5	0.740017	0.73168	0.140323	3.52413	0.835429
SLCO1C1	4	5	0.740017	0.73168	0.140323	3.52413	0.835429
SVEP1	4	5	0.740017	0.73168	0.140323	3.52413	0.835429
TLL1	4	5	0.740017	0.73168	0.140323	3.52413	0.835429
CELSR2	6	4	0.74888	1.41403	0.322509	7.0567	0.835429
DOCK10	6	4	0.74888	1.41403	0.322509	7.0567	0.835429
FLNC	6	4	0.74888	1.41403	0.322509	7.0567	0.835429
LTBP1	6	4	0.74888	1.41403	0.322509	7.0567	0.835429
MYH13	6	4	0.74888	1.41403	0.322509	7.0567	0.835429
MYH2	6	4	0.74888	1.41403	0.322509	7.0567	0.835429
PAXIP1	6	4	0.74888	1.41403	0.322509	7.0567	0.835429
AKAP9	5	6	0.760599	0.761206	0.176767	3.11783	0.835429
ARID1B	5	6	0.760599	0.761206	0.176767	3.11783	0.835429
C12orf51	5	6	0.760599	0.761206	0.176767	3.11783	0.835429
C1orf173	5	6	0.760599	0.761206	0.176767	3.11783	0.835429
CNTN1	5	6	0.760599	0.761206	0.176767	3.11783	0.835429
DNAH2	5	6	0.760599	0.761206	0.176767	3.11783	0.835429
DSEL	5	6	0.760599	0.761206	0.176767	3.11783	0.835429
FAT1	5	6	0.760599	0.761206	0.176767	3.11783	0.835429
FLJ46321	5	6	0.760599	0.761206	0.176767	3.11783	0.835429
GRM8	5	6	0.760599	0.761206	0.176767	3.11783	0.835429
HDAC9	5	6	0.760599	0.761206	0.176767	3.11783	0.835429
MTUS2	5	6	0.760599	0.761206	0.176767	3.11783	0.835429
NCAM2	5	6	0.760599	0.761206	0.176767	3.11783	0.835429
NCOR2	5	6	0.760599	0.761206	0.176767	3.11783	0.835429
PKD1L1	5	6	0.760599	0.761206	0.176767	3.11783	0.835429
PXDNL	5	6	0.760599	0.761206	0.176767	3.11783	0.835429
SUPT6H	5	6	0.760599	0.761206	0.176767	3.11783	0.835429
VPS13D	5	6	0.760599	0.761206	0.176767	3.11783	0.835429
CREBBP	7	5	0.768854	1.31937	0.345187	5.48668	0.838403
DIDO1	7	5	0.768854	1.31937	0.345187	5.48668	0.838403
DPP10	7	5	0.768854	1.31937	0.345187	5.48668	0.838403
FAM135B	7	5	0.768854	1.31937	0.345187	5.48668	0.838403
LRFN5	7	5	0.768854	1.31937	0.345187	5.48668	0.838403
HERC2	6	7	0.77668	0.782001	0.207889	2.84241	0.838403
PLEC	6	7	0.77668	0.782001	0.207889	2.84241	0.838403
PRKDC	6	7	0.77668	0.782001	0.207889	2.84241	0.838403
PTPRT	6	7	0.77668	0.782001	0.207889	2.84241	0.838403
RP1	6	7	0.77668	0.782001	0.207889	2.84241	0.838403
RYR1	6	7	0.77668	0.782001	0.207889	2.84241	0.838403
SPEF2	6	7	0.77668	0.782001	0.207889	2.84241	0.838403
VPS13B	6	7	0.77668	0.782001	0.207889	2.84241	0.838403
TRRAP	8	6	0.78447	1.25603	0.364455	4.5912	0.845692
GNAS	7	8	0.789669	0.797333	0.234686	2.64224	0.850172
MED12L	8	9	0.800428	0.809016	0.257977	2.48999	0.858354
RELN	8	9	0.800428	0.809016	0.257977	2.48999	0.858354
SACS	8	9	0.800428	0.809016	0.257977	2.48999	0.858354
APOB	10	8	0.807555	1.17629	0.39568	3.61415	0.864685
CNTNAP5	9	10	0.809514	0.818137	0.278361	2.36983	0.864685
DNAH3	9	10	0.809514	0.818137	0.278361	2.36983	0.864685
MUC17	11	9	0.816399	1.14946	0.408479	3.31944	0.870729
ATM	10	11	0.81731	0.825389	0.29631	2.27236	0.870729
OBSCN	13	11	0.830599	1.11	0.429967	2.91461	0.883731
BIRC6	6	5	1	1.11932	0.273252	4.8202	1
C1orf129	6	5	1	1.11932	0.273252	4.8202	1
COL11A1	10	10	1	0.919029	0.324106	2.60574	1
FRYL	6	5	1	1.11932	0.273252	4.8202	1
GPR98	11	11	1	0.918074	0.339592	2.48168	1
ZNF831	6	5	1	1.11932	0.273252	4.8202	1
AHNAK2	7	7	1	0.921765	0.263413	3.22542	1
AKAP6	5	4	1	1.16661	0.242208	6.08219	1
ANKRD30B	5	4	1	1.16661	0.242208	6.08219	1
BDP1	5	4	1	1.16661	0.242208	6.08219	1
BPTF	5	4	1	1.16661	0.242208	6.08219	1
C6orf170	5	4	1	1.16661	0.242208	6.08219	1
CACNA1A	7	6	1	1.08749	0.299179	4.09051	1
CCDC88A	5	4	1	1.16661	0.242208	6.08219	1
CDH7	5	5	1	0.923489	0.204683	4.16635	1
CHD8	5	4	1	1.16661	0.242208	6.08219	1
CMYA5	7	6	1	1.08749	0.299179	4.09051	1
COL18A1	5	4	1	1.16661	0.242208	6.08219	1
COL22A1	5	4	1	1.16661	0.242208	6.08219	1
DGKI	5	4	1	1.16661	0.242208	6.08219	1
EP300	6	6	1	0.922637	0.236445	3.59966	1
FIGN	5	4	1	1.16661	0.242208	6.08219	1
FLT3	5	4	1	1.16661	0.242208	6.08219	1
FREM2	8	8	1	0.920874	0.286504	2.95955	1
FSIP2	9	8	1	1.04717	0.340213	3.28308	1
IGF2R	5	4	1	1.16661	0.242208	6.08219	1
KANK1	5	5	1	0.923489	0.204683	4.16635	1
KIAA1109	5	5	1	0.923489	0.204683	4.16635	1
KIDINS220	5	5	1	0.923489	0.204683	4.16635	1
LAMA5	6	6	1	0.922637	0.236445	3.59966	1
MDN1	9	8	1	1.04717	0.340213	3.28308	1
MEGF8	5	5	1	0.923489	0.204683	4.16635	1
MLL3	9	8	1	1.04717	0.340213	3.28308	1
MYH10	5	4	1	1.16661	0.242208	6.08219	1
MYH14	5	4	1	1.16661	0.242208	6.08219	1
MYH6	5	4	1	1.16661	0.242208	6.08219	1
MYOM2	5	4	1	1.16661	0.242208	6.08219	1
NALCN	5	4	1	1.16661	0.242208	6.08219	1
PIKFYVE	5	4	1	1.16661	0.242208	6.08219	1
PKHD1L1	14	12	1	1.09498	0.439044	2.76944	1
PLXNB2	6	6	1	0.922637	0.236445	3.59966	1
SEC24B	5	4	1	1.16661	0.242208	6.08219	1
SPAG17	5	4	1	1.16661	0.242208	6.08219	1
SRRM2	5	5	1	0.923489	0.204683	4.16635	1
TSGA10	5	4	1	1.16661	0.242208	6.08219	1
VWF	5	4	1	1.16661	0.242208	6.08219	1
WDFY3	5	4	1	1.16661	0.242208	6.08219	1
ZNF646	5	4	1	1.16661	0.242208	6.08219	1
ZNF676	5	5	1	0.923489	0.204683	4.16635	1
