# Supplementary material for: Maftools: efficient and comprehensive analysis of somatic variants in cancer
Source: HighWire-hosted journal article supplement (doi:10.1101/gr.239244.118), 2018-10-19
Supplement: Supplemental_Table_S5.xlsx [file Supplemental_Table_S5.xlsx]

## Sheet: Supplemental_Table_S5
Supplemental Table S5: Top ten mutated protein domains in ESCC and EAC
Subtype	DomainLabel	nMuts	nGenes	pfam	Description
ESCC	7tm_1	249	198	pfam00001	7 transmembrane receptor (rhodopsin family)
ESCC	COG5048	238	156	NA	FOG: Zn-finger [General function prediction only]
ESCC	Cadherin_repeat	151	69	cd11304	Cadherin tandem repeat domain
ESCC	FN3	112	61	One of three types of internal repeats found in the plasma protein fibronectin. Its tenth fibronectin type III repeat contains an RGD cell recognition sequence in a flexible loop between 2 strands. Approximately 2% of all...	Fibronectin type 3 domain
ESCC	P53	85	2	cd08367	P53 DNA-binding domain
ESCC	COG2319	81	60	NA	FOG: WD40 repeat [General function prediction only]
ESCC	I-set	76	35	pfam07679	Immunoglobulin I-set domain
ESCC	WD40	53	44	typically contains a GH dipeptide 11-24 residues from...	WD40 domain, found in a number of eukaryotic proteins that cover a wide variety of functions including adaptor/regulatory modules in signal transduction, pre-mRNA processing and cytoskeleton assembly
ESCC	ANK	52	39	ankyrin repeats mediate protein-protein interactions in very diverse families of proteins. The number of ANK repeats in a protein can range from 2 to over 20 (ankyrins, for example). ANK repeats may occur in combinations with other...	ankyrin repeats
ESCC	LRR_RI	50	37	cl15309	Leucine-rich repeats (LRRs), ribonuclease inhibitor (RI)-like subfamily. LRRs are 20-29 residue sequence motifs present in many proteins that participate in protein-protein interactions and have different functions and cellular locations. LRRs correspond...
EAC	7tm_1	438	289	pfam00001	7 transmembrane receptor (rhodopsin family)
EAC	COG5048	281	185	NA	FOG: Zn-finger [General function prediction only]
EAC	Cadherin_repeat	232	86	cd11304	Cadherin tandem repeat domain
EAC	FN3	183	68	One of three types of internal repeats found in the plasma protein fibronectin. Its tenth fibronectin type III repeat contains an RGD cell recognition sequence in a flexible loop between 2 strands. Approximately 2% of all...	Fibronectin type 3 domain
EAC	I-set	134	47	pfam07679	Immunoglobulin I-set domain
EAC	Ion_trans	95	41	pfam00520	Ion transport protein
EAC	COG2319	81	58	NA	FOG: WD40 repeat [General function prediction only]
EAC	Ig	79	52	cl11960	Immunoglobulin domain
EAC	ANK	73	51	ankyrin repeats mediate protein-protein interactions in very diverse families of proteins. The number of ANK repeats in a protein can range from 2 to over 20 (ankyrins, for example). ANK repeats may occur in combinations with other...	ankyrin repeats
EAC	P53	67	3	cd08367	P53 DNA-binding domain
