# Supplementary material for: Maftools: efficient and comprehensive analysis of somatic variants in cancer
Source: HighWire-hosted journal article supplement (doi:10.1101/gr.239244.118), 2018-10-19
Supplement: Supplemental_Table_S6.xlsx [file Supplemental_Table_S6.xlsx]

## Sheet: Supplemental_Table_S6
Supplemental Table S6: Genes mutated in mutually exclusive and co-occuring manner in AML
a number of cases where neither gene1 nor gene2 is mutated
b number of cases where gene1 and gene2 are mutated togeather
c number of cases where gene1 is not-mutated and gene2 is mutated
d number of cases where gene1 is mutated and gene2 is not-mutated
gene1	gene2	P-value	Odds-Ratio	0a	11b	01c	10d	Event
RUNX1	ASXL1	0.000157376	54.9016	175	4	1	12	Co_Occurance
RUNX1	IDH2	0.000290617	9.53258	163	7	13	9	Co_Occurance
IDH2	ASXL1	0.000411435	40.8398	171	4	1	16	Co_Occurance
FLT3	NPM1	0.00104127	3.73316	124	17	16	35	Co_Occurance
SMC3	DNMT3A	0.00107735	20.0377	143	6	42	1	Co_Occurance
NPM1	DNMT3A	0.00150259	3.70408	127	16	32	17	Co_Occurance
DNMT3A	IDH1	0.00352845	4.42973	136	10	8	38	Co_Occurance
TTN	ASXL1	0.00784027	28.3054	183	2	3	4	Co_Occurance
RUNX1	PHF6	0.0082269	12.8927	173	3	3	13	Co_Occurance
RUNX1	TTN	0.0082269	12.8927	173	3	3	13	Co_Occurance
TP53	FLT3	0.0124927	0	125	NA	52	15	Mutually_Exclusive
STAG2	PTPN11	0.0266588	12.3227	179	2	7	4	Co_Occurance
IDH2	NPM1	0.0276231	0	139	NA	33	20	Mutually_Exclusive
IDH2	KRAS	0.0387926	5.79828	167	3	5	17	Co_Occurance
WT1	PHF6	0.0468111	8.57484	176	2	4	10	Co_Occurance
NPM1	PTPN11	0.0487633	4.20293	154	4	5	29	Co_Occurance
IDH2	PLCE1	0.0545843	9.22593	170	2	2	18	Co_Occurance
NPM1	SMC1A	0.0643753	5.13446	156	3	3	30	Co_Occurance
NRAS	CEBPA	0.0686935	4.12467	167	3	10	12	Co_Occurance
FLT3	RUNX1	0.074128	0.164386	125	1	15	51	Mutually_Exclusive
FAM5C	EZH2	0.0764975	21.5856	185	1	2	4	Co_Occurance
RUNX1	DNMT3A	0.0776418	0.184026	129	1	47	15	Mutually_Exclusive
NPM1	TP53	0.0782788	0	144	NA	15	33	Mutually_Exclusive
RUNX1	NPM1	0.0788399	0	143	NA	33	16	Mutually_Exclusive
RUNX1	STAG2	0.0803209	6.03197	172	2	4	14	Co_Occurance
TET2	STAG2	0.089715	5.60624	171	2	4	15	Co_Occurance
DNMT3A	FLT3	0.0902829	1.93397	110	18	34	30	Co_Occurance
NPM1	IDH1	0.0922742	2.70402	147	6	12	27	Co_Occurance
RAD21	DNMT3A	0.100726	4.68619	142	3	45	2	Co_Occurance
FLT3	IDH2	0.107642	0.2725	122	2	18	50	Mutually_Exclusive
DNMT3A	KRAS	0.109198	3.1585	140	4	4	44	Co_Occurance
KRAS	FLT3	0.110516	0	132	NA	52	8	Mutually_Exclusive
U2AF1	FLT3	0.110516	0	132	NA	52	8	Mutually_Exclusive
PHF6	PLCE1	0.12016	11.7229	183	1	3	5	Co_Occurance
KRAS	EZH2	0.120467	12.4861	182	1	2	7	Co_Occurance
FAM5C	FLT3	0.123857	4.18638	138	3	49	2	Co_Occurance
NPM1	WT1	0.129797	2.58686	151	4	8	29	Co_Occurance
U2AF1	RUNX1	0.135745	3.99931	170	2	14	6	Co_Occurance
PHF6	FAM5C	0.14824	8.824	182	1	4	5	Co_Occurance
PLCE1	KIT	0.157696	8.37673	181	1	7	3	Co_Occurance
PLCE1	KRAS	0.157696	8.37673	181	1	7	3	Co_Occurance
PLCE1	U2AF1	0.157696	8.37673	181	1	7	3	Co_Occurance
TTN	PHF6	0.175569	7.06489	181	1	5	5	Co_Occurance
CEBPA	WT1	0.189889	3.04574	169	2	10	11	Co_Occurance
ASXL1	KRAS	0.193539	6.28949	180	1	7	4	Co_Occurance
ASXL1	U2AF1	0.193539	6.28949	180	1	7	4	Co_Occurance
PTPN11	IDH1	0.201448	2.95718	167	2	16	7	Co_Occurance
PHF6	SMC3	0.202164	5.87859	180	1	6	5	Co_Occurance
TTN	SMC3	0.202164	5.87859	180	1	6	5	Co_Occurance
FAM5C	NPM1	0.204719	3.3259	156	2	31	3	Co_Occurance
RAD21	NPM1	0.204719	3.3259	156	2	31	3	Co_Occurance
NRAS	EZH2	0.217587	6.13093	175	1	2	14	Co_Occurance
TET2	IDH2	0.224725	0	155	NA	20	17	Mutually_Exclusive
PHF6	U2AF1	0.22804	5.02763	179	1	7	5	Co_Occurance
EZH2	RUNX1	0.230849	5.69882	174	1	15	2	Co_Occurance
TET2	EZH2	0.243959	5.31904	173	1	2	16	Co_Occurance
PHF6	PTPN11	0.253212	4.38539	178	1	8	5	Co_Occurance
SMC1A	PTPN11	0.253212	4.38539	178	1	8	5	Co_Occurance
EZH2	IDH1	0.25692	4.98293	172	1	17	2	Co_Occurance
U2AF1	SMC3	0.261242	4.17966	178	1	6	7	Co_Occurance
RUNX1	WT1	0.262851	2.35707	166	2	10	14	Co_Occurance
STAG2	NPM1	0.274891	2.48483	155	2	31	4	Co_Occurance
WT1	FAM5C	0.278355	3.9498	176	1	4	11	Co_Occurance
SMC3	PTPN11	0.289347	3.64412	177	1	8	6	Co_Occurance
U2AF1	KIT	0.293189	3.5708	177	1	7	7	Co_Occurance
U2AF1	KRAS	0.293189	3.5708	177	1	7	7	Co_Occurance
RUNX1	PLCE1	0.295962	3.79933	173	1	3	15	Co_Occurance
WT1	SMC1A	0.324664	3.15127	175	1	5	11	Co_Occurance
WT1	STAG2	0.324664	3.15127	175	1	5	11	Co_Occurance
WT1	TTN	0.324664	3.15127	175	1	5	11	Co_Occurance
ASXL1	FLT3	0.325961	0	135	NA	52	5	Mutually_Exclusive
TP53	NRAS	0.330926	1.93243	164	2	13	13	Co_Occurance
NRAS	FAM5C	0.337156	3.06123	173	1	4	14	Co_Occurance
TP53	FAM5C	0.337156	3.06123	173	1	4	14	Co_Occurance
NRAS	RAD21	0.337156	3.06123	173	1	4	14	Co_Occurance
STAG2	DNMT3A	0.339571	0	138	NA	48	6	Mutually_Exclusive
NPM1	SMC3	0.345063	1.97856	154	2	5	31	Co_Occurance
CEBPA	SMC1A	0.347175	2.87547	174	1	5	12	Co_Occurance
NPM1	U2AF1	0.35502	0	151	NA	8	33	Mutually_Exclusive
NRAS	FLT3	0.362965	0.392321	127	2	50	13	Mutually_Exclusive
TP53	DNMT3A	0.36445	0.439678	131	2	46	13	Mutually_Exclusive
WT1	SMC3	0.368234	2.61672	174	1	6	11	Co_Occurance
IDH1	TP53	0.368544	0	159	NA	15	18	Mutually_Exclusive
NRAS	IDH2	0.373854	0	157	NA	20	15	Mutually_Exclusive
TP53	IDH2	0.373854	0	157	NA	20	15	Mutually_Exclusive
TET2	FAM5C	0.374179	2.65208	171	1	4	16	Co_Occurance
TET2	DNMT3A	0.377611	1.7218	133	6	42	11	Co_Occurance
STAG2	NRAS	0.390325	2.44087	172	1	14	5	Co_Occurance
FLT3	SMC3	0.390866	2.07268	136	3	4	49	Co_Occurance
ASXL1	IDH1	0.39206	2.48325	170	1	17	4	Co_Occurance
SMC3	CEBPA	0.392803	2.38728	173	1	12	6	Co_Occurance
FLT3	IDH1	0.407717	0.511761	125	3	15	49	Mutually_Exclusive
KIT	WT1	0.409213	2.23363	173	1	11	7	Co_Occurance
U2AF1	DNMT3A	0.414979	1.84652	139	3	45	5	Co_Occurance
TET2	SMC1A	0.431072	2.11393	170	1	5	16	Co_Occurance
SMC3	NRAS	0.439492	2.02582	171	1	14	6	Co_Occurance
SMC3	TP53	0.439492	2.02582	171	1	14	6	Co_Occurance
PTPN11	WT1	0.447743	1.94569	172	1	11	8	Co_Occurance
IDH1	SMC1A	0.450578	1.97908	169	1	5	17	Co_Occurance
SMC3	RUNX1	0.461659	1.88101	170	1	15	6	Co_Occurance
PTPN11	CEBPA	0.475356	1.77455	171	1	12	8	Co_Occurance
SMC3	TET2	0.483071	1.754	169	1	16	6	Co_Occurance
U2AF1	NRAS	0.484939	1.72855	170	1	14	7	Co_Occurance
IDH2	PHF6	0.487922	1.75156	167	1	5	19	Co_Occurance
IDH2	STAG2	0.487922	1.75156	167	1	5	19	Co_Occurance
IDH2	TTN	0.487922	1.75156	167	1	5	19	Co_Occurance
RUNX1	KRAS	0.508219	1.60474	169	1	7	15	Co_Occurance
FLT3	CEBPA	0.519706	0.470652	129	2	11	50	Mutually_Exclusive
NRAS	PTPN11	0.526928	1.50514	169	1	8	14	Co_Occurance
TP53	PTPN11	0.526928	1.50514	169	1	8	14	Co_Occurance
KIT	TET2	0.530572	1.49631	168	1	16	7	Co_Occurance
KRAS	TET2	0.530572	1.49631	168	1	16	7	Co_Occurance
U2AF1	TET2	0.530572	1.49631	168	1	16	7	Co_Occurance
NRAS	DNMT3A	0.534017	1.55422	134	5	43	10	Co_Occurance
KIT	IDH1	0.552032	1.40055	167	1	17	7	Co_Occurance
U2AF1	IDH1	0.552032	1.40055	167	1	17	7	Co_Occurance
FLT3	EZH2	0.564308	0	137	NA	3	52	Mutually_Exclusive
PLCE1	FLT3	0.575835	0	136	NA	52	4	Mutually_Exclusive
NPM1	ASXL1	0.589933	0	154	NA	5	33	Mutually_Exclusive
IDH2	U2AF1	0.592391	1.2391	165	1	7	19	Co_Occurance
PTPN11	IDH2	0.601252	0	163	NA	20	9	Mutually_Exclusive
TP53	WT1	0.603699	0	165	NA	12	15	Mutually_Exclusive
TET2	WT1	0.605099	0	163	NA	12	17	Mutually_Exclusive
CEBPA	RUNX1	0.606303	0	163	NA	16	13	Mutually_Exclusive
RAD21	FLT3	0.613626	1.8202	137	2	50	3	Co_Occurance
TP53	RUNX1	0.618874	0	161	NA	16	15	Mutually_Exclusive
TET2	NRAS	0.627266	1.65632	162	2	13	15	Co_Occurance
NRAS	IDH1	0.636913	1.54399	161	2	16	13	Co_Occurance
RUNX1	TET2	0.638356	1.52938	161	2	15	14	Co_Occurance
SMC1A	DNMT3A	0.640932	1.5181	140	2	46	4	Co_Occurance
TTN	DNMT3A	0.640932	1.5181	140	2	46	4	Co_Occurance
SMC1A	FLT3	0.662801	1.35769	136	2	50	4	Co_Occurance
STAG2	FLT3	0.662801	1.35769	136	2	50	4	Co_Occurance
TTN	FLT3	0.662801	1.35769	136	2	50	4	Co_Occurance
IDH1	TET2	0.663953	1.32287	159	2	15	16	Co_Occurance
DNMT3A	KIT	0.681865	0.417923	137	1	7	47	Mutually_Exclusive
FLT3	KIT	0.685144	0.374061	133	1	7	51	Mutually_Exclusive
PTPN11	DNMT3A	0.693227	1.52961	138	3	45	6	Co_Occurance
IDH1	IDH2	0.699339	0.481322	155	1	19	17	Mutually_Exclusive
NPM1	NRAS	0.725619	1.22363	147	3	12	30	Co_Occurance
WT1	DNMT3A	0.733465	0.584044	134	2	46	10	Mutually_Exclusive
WT1	FLT3	0.737663	1.37258	132	4	48	8	Co_Occurance
TET2	NPM1	0.741832	0.620721	144	2	31	15	Mutually_Exclusive
TET2	FLT3	0.781127	1.13397	128	5	47	12	Co_Occurance
PLCE1	ASXL1	1	0	183	NA	5	4	Mutually_Exclusive
PLCE1	FAM5C	1	0	183	NA	5	4	Mutually_Exclusive
PLCE1	RAD21	1	0	183	NA	5	4	Mutually_Exclusive
SMC3	PLCE1	1	0	181	NA	4	7	Mutually_Exclusive
PLCE1	DNMT3A	1	1	141	1	47	3	Mutually_Exclusive
PHF6	NPM1	1	0.962681	154	1	32	5	Mutually_Exclusive
TTN	NPM1	1	0.962681	154	1	32	5	Mutually_Exclusive
EZH2	NPM1	1	0	156	NA	33	3	Mutually_Exclusive
WT1	IDH2	1	0.771291	161	1	19	11	Mutually_Exclusive
FAM5C	IDH2	1	0	167	NA	20	5	Mutually_Exclusive
RAD21	IDH2	1	0	167	NA	20	5	Mutually_Exclusive
CEBPA	IDH1	1	0.794997	162	1	17	12	Mutually_Exclusive
KRAS	IDH1	1	0	166	NA	18	8	Mutually_Exclusive
SMC3	IDH1	1	0	167	NA	18	7	Mutually_Exclusive
PHF6	IDH1	1	0	168	NA	18	6	Mutually_Exclusive
STAG2	IDH1	1	0	168	NA	18	6	Mutually_Exclusive
TTN	IDH1	1	0	168	NA	18	6	Mutually_Exclusive
PTPN11	TET2	1	0	166	NA	17	9	Mutually_Exclusive
PHF6	TET2	1	0	169	NA	17	6	Mutually_Exclusive
TTN	TET2	1	0	169	NA	17	6	Mutually_Exclusive
IDH1	RUNX1	1	0.624836	159	1	15	17	Mutually_Exclusive
FAM5C	RUNX1	1	0	171	NA	16	5	Mutually_Exclusive
RAD21	RUNX1	1	0	171	NA	16	5	Mutually_Exclusive
PLCE1	NRAS	1	0	173	NA	15	4	Mutually_Exclusive
CEBPA	TP53	1	0.982234	165	1	14	12	Mutually_Exclusive
PLCE1	TP53	1	0	173	NA	15	4	Mutually_Exclusive
IDH2	CEBPA	1	0.702901	160	1	12	19	Mutually_Exclusive
TET2	CEBPA	1	0.849661	163	1	12	16	Mutually_Exclusive
ASXL1	WT1	1	0	175	NA	12	5	Mutually_Exclusive
RAD21	WT1	1	0	175	NA	12	5	Mutually_Exclusive
TTN	PTPN11	1	0	177	NA	9	6	Mutually_Exclusive
NPM1	KIT	1	0.679791	152	1	7	32	Mutually_Exclusive
KRAS	KIT	1	0	176	NA	8	8	Mutually_Exclusive
NPM1	KRAS	1	0.679791	152	1	7	32	Mutually_Exclusive
ASXL1	PHF6	1	0	181	NA	6	5	Mutually_Exclusive
RAD21	PHF6	1	0	181	NA	6	5	Mutually_Exclusive
SMC3	SMC1A	1	0	179	NA	6	7	Mutually_Exclusive
ASXL1	SMC1A	1	0	181	NA	6	5	Mutually_Exclusive
FAM5C	SMC1A	1	0	181	NA	6	5	Mutually_Exclusive
RAD21	SMC1A	1	0	181	NA	6	5	Mutually_Exclusive
SMC3	STAG2	1	0	179	NA	6	7	Mutually_Exclusive
ASXL1	STAG2	1	0	181	NA	6	5	Mutually_Exclusive
FAM5C	STAG2	1	0	181	NA	6	5	Mutually_Exclusive
RAD21	STAG2	1	0	181	NA	6	5	Mutually_Exclusive
FAM5C	TTN	1	0	181	NA	6	5	Mutually_Exclusive
RAD21	TTN	1	0	181	NA	6	5	Mutually_Exclusive
PTPN11	ASXL1	1	0	178	NA	5	9	Mutually_Exclusive
PTPN11	FAM5C	1	0	178	NA	5	9	Mutually_Exclusive
PTPN11	RAD21	1	0	178	NA	5	9	Mutually_Exclusive
WT1	PLCE1	1	0	176	NA	4	12	Mutually_Exclusive
PTPN11	PLCE1	1	0	179	NA	4	9	Mutually_Exclusive
EZH2	PLCE1	1	0	185	NA	4	3	Mutually_Exclusive
CEBPA	EZH2	1	0	176	NA	3	13	Mutually_Exclusive
PHF6	EZH2	1	0	183	NA	3	6	Mutually_Exclusive
SMC1A	EZH2	1	0	183	NA	3	6	Mutually_Exclusive
STAG2	EZH2	1	0	183	NA	3	6	Mutually_Exclusive
TTN	EZH2	1	0	183	NA	3	6	Mutually_Exclusive
