# Supplementary material for: Maftools: efficient and comprehensive analysis of somatic variants in cancer
Source: HighWire-hosted journal article supplement (doi:10.1101/gr.239244.118), 2018-10-19
Supplement: Supplemental_Table_S7.xlsx [file Supplemental_Table_S7.xlsx]

## Sheet: Supplemental_Table_S7
Supplemental Table S7: Gene sets (N = 3) mutated in mutually exclusive manner in AML
Gene set	P-value
TP53, FLT3, RUNX1	4.83038e-05
TP53, IDH2, FLT3	8.59659e-05
TP53, FLT3, IDH1	0.00122855
TP53, FLT3, KIT	0.00138125
IDH2, FLT3, NRAS	0.00206803
IDH2, NPM1, TET2	0.00295815
TP53, FLT3, PHF6	0.00304956
TP53, RUNX1, DNMT3A	0.00510981
IDH2, FLT3, KIT	0.00557888
FLT3, RUNX1, KRAS	0.00610408
IDH2, NPM1, KIT	0.00670356
TP53, FLT3, CEBPA	0.00712379
RUNX1, DNMT3A, KIT	0.00912773
FLT3, RUNX1, NRAS	0.0105186
IDH2, FLT3, IDH1	0.0132655
FLT3, RUNX1, IDH1	0.0141891
TP53, FLT3, NRAS	0.0143354
IDH2, FLT3, PTPN11	0.0154049
FLT3, KRAS, U2AF1	0.0161443
RUNX1, NPM1, KIT	0.0167961
TP53, IDH2, IDH1	0.0171329
TP53, FLT3, STAG2	0.0172528
TP53, FLT3, TTN	0.0172528
TP53, FLT3, SMC1A	0.0172528
IDH2, FLT3, CEBPA	0.0198007
TP53, NPM1, KRAS	0.0209901
TP53, NPM1, KIT	0.0209901
IDH2, NPM1, NRAS	0.0219871
RUNX1, NPM1, CEBPA	0.0228305
RUNX1, DNMT3A, FAM5C	0.0235695
TP53, FLT3, RAD21	0.0240577
FLT3, RUNX1, PLCE1	0.0240577
TP53, FLT3, PTPN11	0.0257381
FLT3, RUNX1, U2AF1	0.0257381
FLT3, RUNX1, EZH2	0.0332952
RUNX1, CEBPA, DNMT3A	0.0336982
TP53, RUNX1, IDH1	0.0345792
TP53, NPM1, PHF6	0.0346491
TP53, NPM1, TTN	0.0346491
TP53, FLT3, WT1	0.0346733
FLT3, U2AF1, NRAS	0.0348195
IDH2, NPM1, CEBPA	0.0352098
IDH2, FLT3, SMC1A	0.037878
IDH2, FLT3, TET2	0.0382852
TP53, DNMT3A, KIT	0.039785
TP53, NPM1, TET2	0.0418424
IDH2, NPM1, SMC3	0.0420885
FLT3, KRAS, ASXL1	0.0430174
FLT3, U2AF1, ASXL1	0.0430174
TP53, DNMT3A, WT1	0.0433863
STAG2, DNMT3A, KIT	0.0436164
FLT3, U2AF1, IDH1	0.0489061
IDH2, FLT3, RAD21	0.0502453
TP53, IDH2, WT1	0.0513297
IDH2, FLT3, PHF6	0.0526751
IDH2, NPM1, PHF6	0.0534916
IDH2, NPM1, TTN	0.0534916
FLT3, KRAS, PLCE1	0.0589511
FLT3, U2AF1, PLCE1	0.0589511
RUNX1, DNMT3A, SMC1A	0.061814
TP53, DNMT3A, PHF6	0.0667971
TP53, FLT3, TET2	0.0674981
TP53, IDH1, WT1	0.0675118
IDH2, NPM1, FAM5C	0.0676169
IDH2, NPM1, RAD21	0.0676169
FLT3, U2AF1, KIT	0.0704767
RUNX1, NPM1, KRAS	0.0708543
STAG2, DNMT3A, PHF6	0.0764349
IDH2, TET2, KIT	0.0773674
IDH2, FLT3, SMC3	0.077883
FLT3, KRAS, EZH2	0.0802672
IDH2, TET2, NRAS	0.0834709
IDH2, NRAS, PTPN11	0.0861181
FLT3, IDH1, CEBPA	0.086616
IDH2, TET2, SMC3	0.0924528
TP53, NPM1, CEBPA	0.0925266
RUNX1, PTPN11, DNMT3A	0.092745
FLT3, RUNX1, WT1	0.0937614
RUNX1, NPM1, TET2	0.0957527
