# Supplementary material for: Maftools: efficient and comprehensive analysis of somatic variants in cancer
Source: HighWire-hosted journal article supplement (doi:10.1101/gr.239244.118), 2018-10-19
Supplement: Supplemental_Table_S8.xlsx [file Supplemental_Table_S8.xlsx]

## Sheet: Supplemental_Table_S8
Supplemental Table S8: Time taken by major computationally expensive functions. All functions were run on a machine with 64GiB of memeory, Intel Core i7-6700 CPU @ 3.4GHz CPU, and Ubunutu 16.04 LTS operating system.
Function	Cohort	User time (in seconds)
read.maf	ESCA	1.924
	BRCA	2.396
	LAML	0.2
trinucleotideMatrix	ESCC	17.256
	EAC	10.636
extractSignatures	ESCC	74.08
	EAC	69.804
signatureEnrichment	ESCC	5.968
	EAC	22.28
somaticInteractions	LAML	12.292
Oncodrive	LAML	0.628
